1 Full Title: Coding-sequence evolution does not explain divergence in petal anthocyanin  
2 pigmentation between *Mimulus luteus* var. *luteus* and *M. l. variegatus*  
3  
4 Short Title: Monkeyflower pigment divergence not associated with coding-sequence evolution  
5

6  
7 Walker E. Orr<sup>1</sup>

8 Ji Yang Kim<sup>1</sup>

9 Tejas Raj<sup>2</sup>

10 Ellen K. Hom<sup>1</sup>

11 Ashley E. Person<sup>1</sup>

12 Anne Vonada<sup>1</sup>

13 John A. Stratton<sup>2</sup>

14 Arielle M. Cooley<sup>1,\*</sup>

15

16 <sup>1</sup>Whitman College Biology Department, Walla Walla WA, 99362, U.S.A.

17 <sup>2</sup>Whitman College Computer Science Department, Walla Walla WA, 99362, U.S.A.

18 \*Corresponding author

19

## 20 **Abstract**

21 Phenotypic transitions in related taxa often share a common genetic basis, which suggests that  
22 there are constraints that shape the process of evolution at the genetic level. For example,  
23 noncoding changes in a gene may be favored relative to coding changes. Non-coding changes,  
24 which can alter context-specific gene expression, tend to have fewer pleiotropic consequences  
25 than coding changes, which affect the function of a gene product in all contexts. In this study,  
26 we evaluate the importance of coding-sequence changes to the recent evolution of a novel

27 anthocyanin pigmentation trait in the monkeyflower genus *Mimulus*. The magenta-flowered  
28 *Mimulus luteus* var. *variegatus* recently gained petal lobe anthocyanin pigmentation via a single-  
29 locus Mendelian difference from its sister taxon, the yellow-flowered *M. l. luteus*. Mapping and  
30 functional tests previously showed that transcription factor *MYB5a/NEGAN* is the single gene  
31 responsible for this difference. We overexpressed the genomically encoded protein-coding  
32 sequences of *MYB5a*, from both *M. l. luteus* and *M. l. variegatus*, in *Nicotiana tabacum* leaves,  
33 in order to test their efficacy as anthocyanin-pigment activators. Quantitative image analysis of  
34 transfected tobacco leaves revealed robust anthocyanin production driven by both types of  
35 transgenes, compared to a negative control, and overall functional equivalency between the  
36 *luteus* and *variegatus* alleles. This finding supports the hypothesis that petal pigment was not  
37 gained by protein-coding changes in *M. l. variegatus*, but instead via non-coding *cis*-regulatory  
38 evolution. While constructing the transgenes needed for this experiment, we unexpectedly  
39 discovered two sites in *MYB5a* that appear to be post-transcriptionally edited – a phenomenon  
40 that has been rarely reported, and even less often explored, for nuclear-encoded plant mRNAs.

41

42 Keywords: anthocyanin regulation; floral color patterning; gene expression; *cis*-regulatory  
43 evolution; R2R3 MYBs; *Mimulus*; petal lobe pigmentation; post-transcriptional mRNA editing; A-  
44 to-I editing; transient transformation; digital image analysis

45

## 46 **Introduction**

47 To what extent are the molecular mechanisms of evolutionary diversification predictable?  
48 Biologists have long been interested in understanding constraints on the evolutionary process,  
49 which can increase our ability to predict the molecular mechanisms that underlie a specific trait.  
50 For example, coding and noncoding mutations have been hypothesized to differ in their  
51 contributions to evolutionary change (Hoekstra and Coyne, 2007; Stern and Orgogozo, 2008).  
52 Noncoding “*cis*-regulatory” regions integrate upstream signals to determine the conditions under

53 which a protein will be expressed. These regions tend to be organized into modules, and so  
54 mutations can easily generate new patterns of gene expression without altering gene product  
55 function or existing expression patterns (Wray, 2007). By contrast, a change in a gene's coding  
56 sequence tends to be more pleiotropic since it will likely alter the gene product's function in all  
57 contexts under which that gene is expressed. Stern and Orgogozo (2008) have proposed a model  
58 in which the relative importance of coding and noncoding changes to the evolution of a new  
59 function in a gene depends on that gene's function, the selective strength and evolutionary time-  
60 scale, and the position of that gene within gene networks. This model predicts that the contribution  
61 of coding changes to phenotypic transitions will decline with evolutionary distance between the  
62 diverged taxa, due to lower average fitness values for coding changes compared to noncoding  
63 changes. The pattern has been documented empirically by Wittkopp et al. (2008) in *Drosophila*.

64  
65 In plants, transitions in anthocyanin pigmentation are especially well suited to investigating the  
66 mechanisms of molecular evolution (Davies et al., 2012; Sobel and Streisfeld, 2013; LaFountain  
67 and Yuan, 2021; Li et al., 2022). Anthocyanins are a class of flavonoids that are responsible for  
68 purple, pink, and red colors in diverse angiosperm tissues, including leaves, seed coats, and  
69 flowers (Durbin et al., 2003). The anthocyanin biosynthetic pathway (ABP) is well-described and  
70 conserved across taxa (Feller et al., 2011). Depending on the species, ABP genes are organized  
71 into one or two gene batteries. In the model plant *Arabidopsis thaliana*, "early" genes include *CHS*,  
72 *CHI*, and *F3'H*; late genes include *DFR*, *ANS*, and *UF3GT* (Dubos et al., 2010). Early genes  
73 generally encode for enzymes that produce pathway intermediates with diverse fates; these  
74 intermediates play important roles in protection against UV radiation, defense against pathogens,  
75 signaling, male fertility, and auxin signaling (Koes et al., 2005). Late genes encode enzymes that  
76 are responsible for the production of anthocyanins and proanthocyanidins (condensed tannins)  
77 from these intermediates.

78

79 The “late” gene battery is coordinately regulated by MBW transcription factor complexes. In these  
80 complexes, a bHLH protein associates with a WD40 and an R2R3-MYB partner to activate the  
81 transcription of several downstream genes in specific tissues (Grotewold, 2006). Much of the  
82 target specificity of an MBW complex is conferred by the R2R3-MYB partner in the complex:  
83 different tissues make use of different *MYB* genes to stimulate anthocyanin production, but may  
84 use the same *bHLH* gene (Quattrocchio et al., 2006). *MYB* genes thus serve as “input-output”  
85 integrators that regulate gene batteries under highly specific contexts. Consistent with their  
86 position in gene networks and the hypothesized importance of “input-output” genes in repeated  
87 evolution events, *MYB* genes demonstrate remarkable reuse in floral pigment transitions across  
88 a variety of species (Streisfeld and Rausher, 2011; Yuan et al., 2013).

89

90 The independent evolution of petal lobe anthocyanin (PLA) pigmentation in three lineages in the  
91 *luteus* group of the monkeyflower genus *Mimulus* (synonym *Erythranthe*; see Barker (2012) and  
92 Lowry et al. (2019)) provides an opportunity to test the relative importance of coding and  
93 noncoding changes at different evolutionary time-scales (Beardsley and Olmstead, 2002).  
94 *Mimulus* lends itself to studies in plant evo-devo, thanks to a diversity of species with short  
95 generation times, high fecundity, amenability to greenhouse cultivation, and a large range of  
96 environmental adaptation (Wu et al., 2008; Yuan 2018). Sequenced genomes have been  
97 published for several species including *M. guttatus* (Puzey et al., 2017) and *M. l. luteus* (Edger et  
98 al., 2017).

99

100 The *luteus* group of *Mimulus* has an ancestral phenotype of yellow (carotenoid-pigmented)  
101 flowers with red (anthocyanin-pigmented) spots in the nectar guide region (Fig. 1). The overall  
102 color of the anthocyanin-pigmented petal tissue ranges from orange in *M. cupreus*, to red in *M. l.*  
103 *luteus*, to magenta in *M. l. variegatus* and *M. naiandinus*, depending on the relative intensity of  
104 carotenoid and anthocyanin pigmentation (Fig. 1).

105

106 In three members of the *luteus* group—the magenta-flowered *M. l. variegatus* and *M. naiandinus*,

107 and the orange-flowered *M. cupreus*—anthocyanin pigment has expanded into the petal lobes.

108 The gain of PLA is a derived, single-locus Mendelian trait in all three taxa. In *M. cupreus* and *M.*

109 *naiandinus*, this is controlled by the *pla1* locus, which contains candidate anthocyanin-activating

110 genes *MYB2* and *MYB3a* (Cooley et al., 2011). A rare yellow-flowered morph of *M. cupreus* does

111 not bear petal lobe anthocyanins (PLA). Since it is found in a single population in Chile,

112 intermingled with orange morphs of *M. cupreus* (Cooley et al., 2008), it is likely to represent a

113 secondary loss of the PLA trait. The lack of PLA in the yellow morph segregates as a single-locus

114 trait mapping to *pla1*. In *M. l. variegatus*, the gain of PLA is conferred by an unlinked second locus,

115 *pla2*, containing candidate gene *MYB5a/NEGAN*. All of the candidate genes at *pla1* and *pla2*

116 belong to the anthocyanin-activating subgroup 6 of the R2R3 MYB gene family (Cooley et al.,

117 2011).

118

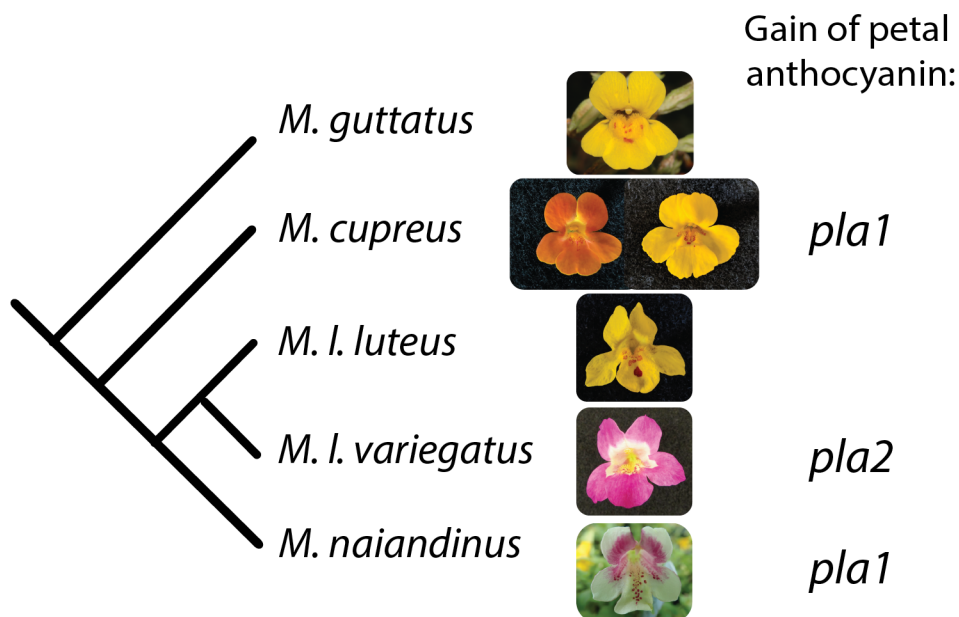

119

120 **Fig. 1.** Petal lobe anthocyanin has been gained repeatedly in the *luteus* group of *Mimulus*. Closely related

121 species outside the *luteus* group, like *M. guttatus*, are typically yellow-flowered, with red anthocyanin

122 pigmentation restricted to the nectar guide region of the corolla. *Mimulus cupreus* and *M. naiandinus* have  
123 each gained petal lobe anthocyanin via a single-locus change at genomic region *pla1*, while the magenta-  
124 petaled *M. luteus* var. *variegatus* gained petal lobe anthocyanin via a change at *pla2*. A rare yellow-flowered  
125 morph of *M. cupreus*, found in a single population in Chile, has lost petal lobe anthocyanin via a change at  
126 *pla1*. Figure modified from Zheng et al. (2021).

127

128

129 While transitions in floral pigment traits have been extensively studied in plants, pigment losses  
130 have been investigated more often than pigment gains (Rausher, 2008). Studying the repeated  
131 gain of PLA in the *luteus* group presents an opportunity to rectify this. PLA transitions in the group  
132 also enable a test of the Stern and Orgogozo (2008) prediction that protein-coding changes are  
133 relatively more important within populations, while noncoding changes become increasingly  
134 abundant as evolutionary divergence increases. Consistent with this prediction, the rare yellow  
135 morph of *M. cupreus* - a within-population polymorphism linked to *pla1* (Cooley and Willis 2009;  
136 Cooley et al. 2011) - appears to be associated with a deletion or other major mutation in exon 3  
137 or 4 of *MYB2* (Supplemental Figures S1-S4). Based on the Stern and Orgogozo (2008) model,  
138 we expect that the fixed gains of PLA in *M. l. variegatus*, orange *M. cupreus*, and *M. naiandinus*,  
139 are more likely to be caused by *cis*-regulatory evolution.

140

141 Of the three taxa that have recently gained PLA, *M. l. variegatus* is the most thoroughly  
142 characterized. In *M. l. variegatus*, a combination of genetic mapping, *MYB5a* RNAi and  
143 overexpression, and transcriptomic studies of wild-type versus *MYB5a* RNAi lines, shows that  
144 *MYB5a* is both necessary and sufficient for the gain of PLA (Cooley et al. 2011; Zheng et al.,  
145 2021), and points to one particular splice variant of the gene as participating in anthocyanin  
146 activation.

147

148 Unlike most *MYB* genes, which have a conserved three-exon structure (Dubos et al., 2010),  
149 *MYB5a* in *M. l. luteus* and *M. l. variegatus* has four exons. The exon 1-2-4 splice variant, but not  
150 the 1-2-3 variant, was found to be abundant specifically in anthocyanin-pigmented petal tissue:  
151 the petal lobes of *M. l. variegatus* and the nectar guide regions of both taxa (Zheng et al. 2021).  
152 Knockdown of the 1-2-4 splice variant resulted in the loss of petal pigmentation from *M. l.*  
153 *variegatus* (Zheng et al., 2021). Finally, the exon 1-2-4 splice variant of *M. l. variegatus* - but not  
154 the 1-2-3 splice variant - contains the subgroup 6 motif found in all known R2R3 MYB anthocyanin  
155 activators (Stracke et al., 2001). Thus, the exon 1-2-4 splice variant of *MYB5a* appears to be  
156 responsible for the gain of petal lobe anthocyanins in *M. l. variegatus*. While its pattern of spatially  
157 specific expression suggests a mechanism of *cis*-regulatory evolution, it is possible that  
158 divergence of the protein-coding sequence of *MYB5a* was additionally required for its function in  
159 *M. l. variegatus* petal lobe tissue.

160

161 In previous studies (Zheng et al., 2021), we relied on the stable transformation procedure  
162 published by Yuan et. al. (2013) to test hypotheses about *MYB* gene function. While the method  
163 is capable of producing stably transformed offspring, it has the disadvantage of having a low  
164 transformation efficiency (about one seed per thousand in *M. l. variegatus*) and a large time cost  
165 of about five months between infiltration of native plants and flowering of transformant offspring.  
166 Transient transformation is an attractive alternative for more rapid tests of gene function,  
167 particularly for genes - such as pigment activators - that are expected to produce an easily visible  
168 phenotype. In transient expression, the transgene is delivered to plant cells and transcribed by  
169 the plant's transcriptional machinery without necessarily being incorporated into the plant's  
170 genome, and transient transformation is regularly used in the tobacco genus *Nicotiana* (Kapila et  
171 al., 1997; Schöb et al., 1997; Yang et al. 2000; Sparkes 2006). *Nicotiana* is relatively closely  
172 related to *Mimulus*, as the two genera belong to the sister orders of Solanales and Lamiales,  
173 respectively, and *Nicotiana* is a highly tractable system for transgenic experimentation. It is

174 routinely used for heterologous genetic experiments *in planta*, including tests of flower color genes  
175 from both rosids and asterids (Montefiori et al., 2015; Tian et al., 2017). Ding and Yuan (2016)  
176 adapted methods from *Nicotiana* for use in *Mimulus lewisii*. In our hands, however, transient  
177 transformation caused substantial leaf tissue death in both *M. lewisii* and *M. l. luteus*. We therefore  
178 returned to *Nicotiana*, using *N. tabacum* as the host for transient tests of *MYB5a* gene function.

179

180 If the gain of petal lobe anthocyanin (PLA) in the magenta-flowered *M. l. variegatus* is caused  
181 solely by a *cis*-regulatory-driven spatial expansion of *MYB5a* function, then we predict that the  
182 coding sequences of *MYB5a* from *M. l. variegatus* and the yellow-flowered *M. l. luteus* will be  
183 equally capable of stimulating anthocyanin production. We tested this hypothesis by transiently  
184 expressing each taxon's *MYB5a* exon 1-2-4 sequence, as well as a negative control, in leaves of  
185 *N. tabacum*. We used a custom image analysis pipeline to rapidly generate quantitative estimates  
186 of pigment production in the transformed leaves.

187

188 Somewhat surprisingly, the *luteus* allele of *MYB5a* was more often successful than the *variegatus*  
189 allele at activating visible quantities of anthocyanin pigmentation in tobacco leaves. However,  
190 amongst leaves that did produce visible anthocyanin, the two alleles of this anthocyanin-activating  
191 transcription factor were statistically indistinguishable. This indicates functional equivalency of the  
192 two sequences, at least in the context of the heterologous tobacco pigmentation pathway, and  
193 points to *cis*-regulatory evolution at the causal *MYB5a* gene as a more likely driver of the gain of  
194 petal lobe anthocyanin pigmentation in *M. l. variegatus*.

195

## 196 **Methods**

197

198 *Plant materials and growth conditions*

199



200 *Nicotiana tabacum* cv. Petit Havana SR1 seeds were obtained from Lehle Seeds (Round Rock,  
201 TX, USA). *Mimulus lewisii*, line LF10HT1 (two generations inbred) seeds were a gift from the  
202 Yao-Wu Yuan lab at the University of Connecticut (Storrs, CT, USA). *Mimulus luteus* var. *luteus*  
203 and *M. l. variegatus* were originally collected in Chile from the El Yeso and Río Cipreses  
204 populations, respectively (Cooley et al. 2008), and self-fertilized repeatedly with single-seed  
205 descent to generate highly inbred lines. In this work, we utilized the 12-generations inbred line  
206 *M. l. luteus* EY7 and the 11-generations inbred line *M. l. variegatus* RC6.

207

208 Seeds were surface-planted on wet soil and grown at Whitman College (Walla Walla, WA, USA)  
209 in a greenhouse with 16-hour day lengths and temperatures ranging from 15°C to 30°C. Plants  
210 were misted daily and fertilized three times per week with Open Sesame flowering fertilizer (Fox  
211 Farm, Samoa, CA, USA).

212

213 *Determining the genomically encoded sequence of MYB5a from M. l. variegatus*

214

215 While investigating the *MYB5a* protein-coding regions of *M. l. luteus* and *M. l. variegatus*, using  
216 the cloning and sequencing methods described in Zheng et al. (2021), we discovered an  
217 unexpected new sequence in the fourth exon of *M. l. variegatus Myb5a*. In two different  
218 sequencing reactions, originating from two distinct cDNA syntheses from a single mRNA  
219 extraction from young bud *M. l. variegatus* tissue, a “GG” variant was found in which adenines  
220 at positions 582 and 684 of the exon 1-2-4 splice variant were replaced with guanines (Figure  
221 2). A third sequencing reaction from the same mRNA extraction produced the expected “AA”  
222 sequence that was previously reported in Zheng et al. (2021). Because the same two variants  
223 were observed, twice each, in the same two samples, we discounted the likelihood of four  
224 random sequencing errors. Instead, we hypothesized that the “GG” variant might be encoded in

225 the genome of *M. l. variegatus*, perhaps representing an alternate allele of *MYB5a* or a closely  
226 related gene duplicate, or that it might be the result of post-transcriptional editing.

227

228 To determine whether the “GG” variant represented the genomic sequence of an unknown,  
229 related *MYB* gene, we cloned and sequenced a fragment of genomic *MYB5a* from an F1 hybrid  
230 of *M. l. luteus* x *M. l. variegatus* using primers Myb5\_64F and Myb5\_57R (Supplemental Table  
231 S1), which encompass the first of the two sites in question; these primers were selected  
232 because they reliably amplified *MYB5a* from both *M. l. luteus* and *M. l. variegatus*. We reasoned  
233 that, if the “GG” variant were from a paralogous *MYB* gene, then we should be able to recover  
234 both variants from the F1 hybrid. The “AA” variant would originate from the *M. l. variegatus*  
235 *MYB5a* and the “GG” variant would originate from the other, unknown gene; we would also  
236 expect to recover the *M. l. luteus* allele of *MYB5a*. If the “GG” variant instead represented  
237 residual heterozygosity in *M. l. variegatus*, or post-transcriptional editing of the mRNA, then any  
238 single F1 hybrid would contain only one of the two *M. l. variegatus* variants, along with the *M. l.*  
239 *luteus* allele of *MYB5a*.

240

241 To determine whether the “GG” variant represented genomically encoded, residual  
242 heterozygosity in our highly inbred *M. l. variegatus*, we similarly cloned and sequenced genomic  
243 *MYB5a* from the *M. l. variegatus* inbred line. If the “GG” variant were the result of post-  
244 transcriptional modification, it should be absent from all genomic DNA samples (both the F1  
245 hybrid and the *M. l. variegatus*).

246

247 Finally, to determine whether the “GG” variant could be repeatably isolated from cDNA, we  
248 performed new mRNA extractions, and cloned and sequenced *MYB5a* cDNA, from two types of  
249 *M. l. variegatus* and *M. l. luteus* floral tissues: the nectar guide region, which is anthocyanin-  
250 pigmented in both taxa, and the petal lobe region, which is anthocyanin-pigmented only in *M. l.*

251 *variegatus*. Because exons 3 and 4 are partial duplicates of each other, primers Myb5\_64F and  
 252 Myb5\_57R (Supplemental Table S1) amplified both splice variants (exon 1-2-3 and 1-2-4) from  
 253 *M. l. luteus*, though only the exon 1-2-4 variant from *M. l. variegatus*. See Supplemental Figure  
 254 S5 for an illustration of primer binding sites for both taxa.

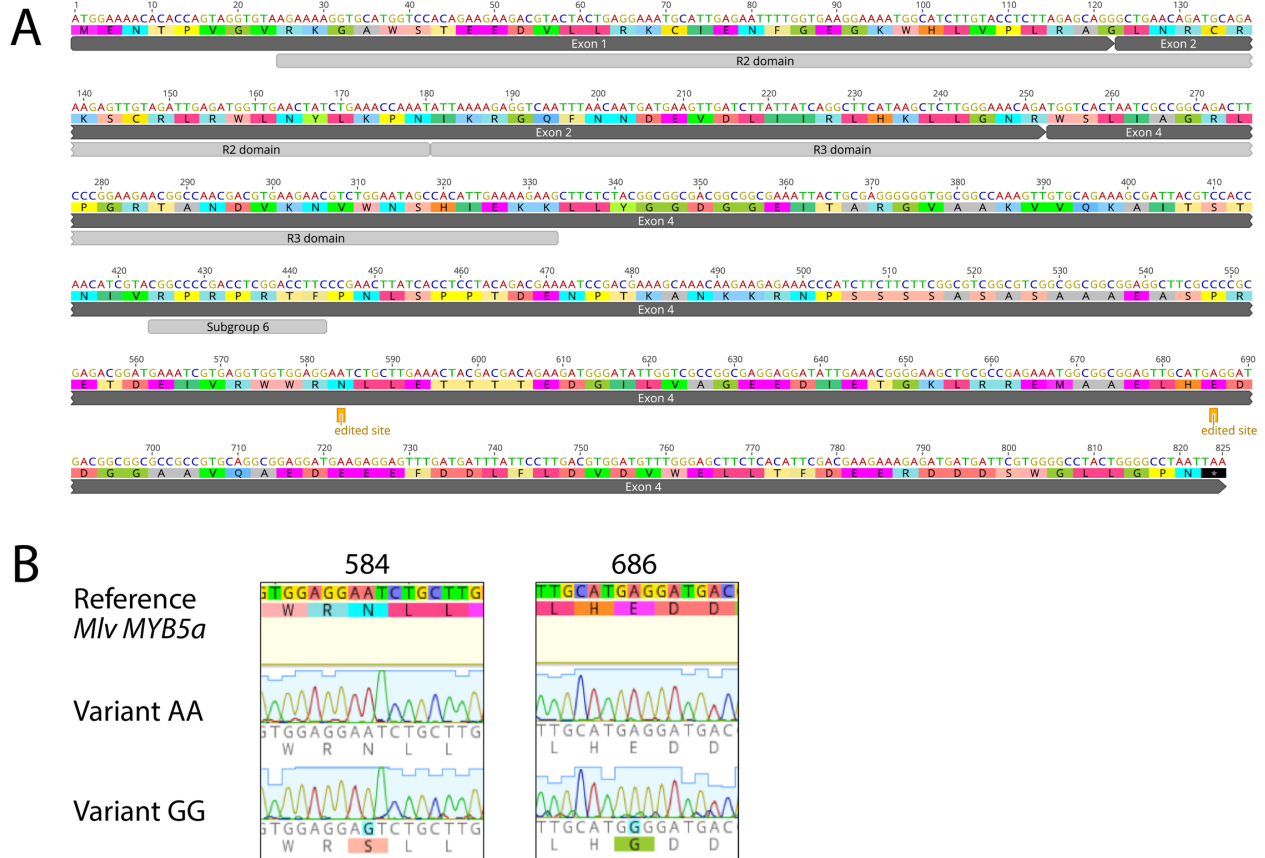

255  
 256 **Figure 2. Putative A-to-I editing sites in the exon 1-2-4 splice variant of *M. l. variegatus* MYB5a.**  
 257 A. Dark gray bars show the exon structure from start codon to stop codon. Light gray bars show the DNA-  
 258 binding R2 and R3 domains common to all members of the R2R3 MYB gene family (Stracke et al. 2001).  
 259 “Subgroup 6” is a sequence motif that is conserved across all R2R3 MYB genes that encode activators of  
 260 anthocyanin biosynthesis (Stracke et al. 2001). The two putative A-to-I editing sites are each marked as  
 261 “edited site”. B. Chromatograms from MYB5a Variant AA and Variant GG. The two polymorphic sites are  
 262 both located in the fourth exon of MYB5, 584 and 686 nucleotides downstream of the translation start site.  
 263 Nucleotide and amino acid differences are highlighted. Sequences were obtained using Sanger  
 264 sequencing and were visualized using Geneious R10.

265

266 *Nucleic acid extraction, PCR, and cloning*

267

268 Genomic DNA was extracted from young leaves and floral buds using the Zypzy DNeasy  
269 Extraction kit (Zymo Research, CA, USA) according to the manufacturers' protocol. RNA was  
270 extracted from buds using the E.Z.N.A. Plant RNA Kit (Omega Bio-Tek, GA, USA) with the  
271 DNase I digestion protocol added to it. cDNA was synthesized using the qScript™ cDNA  
272 Synthesis Kit (Quanta BioSciences, Inc., MD, USA). Quality and concentration of DNA and RNA  
273 were quantified using a nanodrop.

274 Fragments of *MYB5a* spanning one or both adenine/guanine polymorphic sites were PCR  
275 amplified using the primers listed in Table S1 with G-Biosciences Taq polymerase (St. Louis,  
276 MO, USA). Reactions were run with 10μM forward and reverse primers, G-Biosciences 10x  
277 buffer, and 2.5μM dNTPs. Annealing temperatures were set to 3°C below the primer's lowest  
278 melting temperature and the number of PCR cycles ranged from 30-32.

279 PCR products were purified and cloned into pGEM vectors in *E. coli* as described in Zheng et al.  
280 (2021). Colonies were PCR-screened for inserts of the correct size using primers M13F(-20)  
281 and M13R(-24). Sanger sequencing was performed by Eton Biosciences (San Diego, CA, USA)  
282 and sequences were visualized using Geneious R9 and R10.

283

284 *Strategy for testing for functional equivalence of two coding sequences*

285

286 Once the "AA" allele had been identified as the only genomically encoded *MYB5a* sequence  
287 present in the magenta-flowered *M. l. variegatus*, transgenes were constructed to test whether  
288 the exon 1-2-4 splice variant was functionally equivalent to the corresponding allele from the  
289 yellow-flowered *M. l. luteus* (which lacks petal lobe anthocyanins), as described below. Each

290 transgene, as well as a negative control, was transfected into leaves of *Nicotiana tabacum*, and  
291 the area of the spot of anthocyanin pigment produced following each infiltration was quantified.  
292 The heterologous *N. tabacum* system was selected because our pilot studies in *M. l. luteus* and  
293 another monkeyflower species, *M. lewisii*, failed to produce visible anthocyanin pigment.

294

#### 295 *Bacterial culturing for transgene construction*

296

297 *Escherichia coli* cultures were grown at 37°C in Luria-Bertani (LB) broth: 10g/L tryptone, 5g/L  
298 yeast extract, 10g/L NaCl in demineralized water, sterilized by autoclaving. *Agrobacterium*  
299 *tumefaciens* cultures were grown at 28 °C in LB broth with the NaCl concentration reduced from  
300 10g/L to 5g/L.

301

302 Cells containing plasmids with a Kanamycin-resistance gene were grown in media containing 50  
303 µg/mL kanamycin. The *A. tumefaciens* strain, GV3101, used in these studies contains gentamicin-  
304 and rifampicin-resistance genes; these cultures were grown in media additionally containing 50  
305 µg/mL gentamicin and 25 µg/mL rifampicin. Liquid cultures were grown at the appropriate  
306 temperature with shaking at 200 rpm. To isolate individual colonies, cells were grown on plates  
307 containing LB media with appropriate selective antibiotics and 15 g/L agar.

308

#### 309 *Construction of Gateway® Entry Vectors*

310

311 The exon 1-2-4 splice variant of *MYB5a* was amplified from *M. l. variegatus* petal cDNA, using  
312 primers cacc10F and Myb5\_69R (Supplemental Table S1) and New England Biolabs® Phusion®  
313 High-Fidelity DNA Polymerase. Amplicons were transformed into the pEARLEYGATE101  
314 Gateway vector (Earley et al. 2006). From there, the coding sequence without a stop codon was

315 amplified from plasmid DNA containing *M. l. variegatus MYB5a* CDS using the same primers and  
316 polymerase.

317

318 The pENTR-D/TOPO Cloning Kit was used to produce directionally-cloned Gateway® entry  
319 clones carrying *M. l. variegatus MYB5a* CDS. The reaction mixture was transformed into TOP10™  
320 *E. coli* cells, and colonies were screened for the presence of the insert via PCR, using the  
321 Myb5\_10F, M13R(-24) primer pair. Three colonies that gave a band at ~1-kb were selected for  
322 sequencing. The M13F(-20), M13R(-24) primer pair was used to amplify and sequence the insert.  
323 Sanger sequencing was performed by Eton BioScience® (San Diego, CA, USA) and checked for  
324 errors against reference sequence in Geneious® version 9.1.8 (<https://www.geneious.com>).

325

326 For *M. l. luteus*, amplification of the exon 1-2-4 splice variant was attempted without success using  
327 cDNA extracted from young bud tissue of *M. l. luteus* lines EY1 and EY7. *M. l. luteus* EY7 is  
328 known to express *MYB5a* in the anthocyanin-spotted nectar guide region of the flower bud, but  
329 expression levels are low (Zheng et al. 2021). Instead, this protein-coding region was synthesized  
330 by GENEWIZ (Plainfield, NJ, USA) based on the published genomic sequence of *M. l. luteus*  
331 (Edger et al., 2017). The sequence was delivered in a pUC57 vector, but with attL1 and attL2  
332 homology sites added to the 5'- and 3'- ends of the gene, respectively, to facilitate Gateway  
333 recombination. Upon receipt, the plasmid was transformed into TOP10™ chemically competent  
334 *E. coli* cells, and colonies were screened for the presence of the insert via PCR, using Myb5\_12F  
335 internal forward primer and M13R(-24) reverse primer (primer table). Sanger sequencing was  
336 performed by Eton BioScience, and sequence was checked for errors against the reference  
337 sequence in Geneious.

338

339 *Construction of Gateway® Plant Expression Vectors*

340

341 The LR Clonase II kit (ThermoFisher Scientific, Waltham, MA, USA) was used to transfer each  
342 insert from an entry vector to destination vector pEARLEYGATE101 (Earley et al. 2006). Entry  
343 vectors used in this study were pENTR with *M.l.variegatus MYB5a* CDS and pUC57 with  
344 *M.l.luteus MYB5a* CDS.

345

346 Reactions were transformed into TOP10™ chemically competent *E. coli* and screened for the  
347 presence of the insert via PCR and sequencing, using an insert-specific forward primer  
348 (Myb5\_10F for *M. l. variegatus* and Myb5\_12F for *M. l. luteus*) and a reverse primer, att-R2, that  
349 binds to the recombination site at the 3'-end of the insert in recombined pEARLEYGATE vectors.

350

351 To exclude colonies with unrecombined entry vector, restriction endonuclease digests were  
352 performed as an additional diagnostic on plasmid purified from those colonies. Because it cuts  
353 both within the destination vector and within the insert, the HindIII enzyme was used (Promega  
354 Corp., Madison, WI). Reactions were incubated for 60 minutes at 37°C, then heat-inactivated for  
355 15 minutes at 65°C. Colonies that gave the expected digest pattern for recombined destination  
356 construct as well as the correct insert DNA sequence were chosen to proceed with this project.

357

358 *Transformation into Agrobacterium*

359

360 GV3101 electrocompetent *A. tumefaciens* cells, mixed with 1 µL isolated plasmid DNA (25-350  
361 ng/µL) from each construct, were briefly exposed to a 2.5 kV, 200 ohm, 25 µF pulse using a  
362 BioRad® MicroPulser Electroporator (BioRad Laboratories, Hercules, CA, USA). The mixture was  
363 then immediately combined with 1 mL room-temperature LB media without antibiotics, incubated  
364 at 28°C for 2-3 hours with shaking at 200 rpm., then plated on selective media. Putative  
365 transformants were tested for transgene insertion using a PCR screen with primers pEG-35S-  
366 attB1\_F and att-R2 (Supplemental Table S1).



367

368 *GFP-expressing plasmid for negative control*

369

370 To screen for non-specific effects of transgene infiltration, the *A. tumefaciens*-compatible GFP  
371 expression plasmid pGFPGUSPlus was used as a negative control. pGFPGUSPlus was a gift  
372 from Claudia Vickers (Addgene plasmid # 64401; <http://n2t.net/addgene:64401>;  
373 RRID:Addgene\_64401) (Vickers et al., 2007). Using the protocol in the previous section, the  
374 plasmid was transformed into *A. tumefaciens*.

375

376 *Transient transformation*

377

378 A video documenting our transformation methodology, adapted from Ding and Yuan (2016), is  
379 available upon request.

380

381 *Agrobacterium* colonies were PCR-screened to verify that they contained the desired transgene  
382 (pGFPGUSPlus, or *MYB5a* CDS from *M. luteus* or *M. l. variegatus*), and were then grown 16-  
383 24 hours in 5 mL LB (*Agrobacterium* recipe) at 28°C with appropriate antibiotics. The small culture  
384 was brought up to 50 mL with LB plus antibiotics and grown 12-16 hours at 28°C.

385

386 The 50-mL cultures were centrifuged in a Beckman-Coulter Allegra 25R temperature-controlled  
387 benchtop centrifuge (Beckman Coulter Inc, Brea, CA, USA) at 4°C and 6,000 RCF for 15 minutes.  
388 The pellet was resuspended in a volume of 5% sucrose (w/v) solution equivalent to between one  
389 half and one time the original culture's volume. Resuspensions were adjusted, through dilution  
390 with the sucrose solution, to have the same optical density at 600 nm (OD<sub>600</sub>) across all three  
391 transgene types within each trial, with an OD<sub>600</sub> range of 1.6-1.9 across trials. Departing from Ding



392 and Yuan (2016), acetosyringone and Silwet L-77 were not included in the resuspension solution;  
393 omitting these reagents was proposed as a possible solution for leaf tissue damage previously  
394 observed in infiltrated *Mimulus lewisii* leaves (B. Ding, personal communication).

395

396 A B-D 1-mL slip tip disposable SubQ syringe (Becton, Dickinson and Company, Franklin Lakes,  
397 NJ, USA) with the needle removed was used to deliver *A. tumefaciens* cells to the leaves of young  
398 (1-3 months) *N. tabacum*. Using a gloved finger, the top of the leaf was held firmly while the  
399 underside of the leaf was injected with the syringe until the liquid had visibly spread past the site  
400 of injection. A volume of 100-200 $\mu$ L resuspended cells was injected per spot. The *M. l. luteus*  
401 *MYB5a* transgene and the *M. l. variegatus MYB5a* transgene were infiltrated in pairs, alternating  
402 with each leaf which transgene was injected into the left versus the right side of the leaf. A smaller  
403 number of negative controls was performed, with pGFPGUSPlus infiltrations approximately  
404 evenly distributed between the two sides of other leaves on the same plants.

405

#### 406 *Image acquisition and preparation*

407

408 Leaves were imaged starting three days after infiltration, since Li et. al. (2009) reported that  
409 maximum expression of *Agrobacterium*-delivered transgenes occurs 3 days after infiltration.  
410 Because accumulation of visible gene product (anthocyanin) continued for several days after  
411 infiltration in some samples, leaves were imaged until a maximum of twelve days after infiltration.  
412 Digital photographs of infected leaves were then taken in a dark room with a Nikon D3500 DSLR  
413 camera with 18-55mm lens. The camera was fixed on a stand and the leaf was illuminated by a  
414 Sylvania Ceramic Metal Halide bulb, which exceeds 15,000 lumens, as the light source. All  
415 exposures produced both RAW and jpeg images, with RAW images used for the analysis and  
416 jpeg images used for interoperability with image annotation software. VGG Image Annotator was

417 used to demarcate the regions of interest covering the extent of the infiltrated leaf tissue and the  
418 center of each injection site.

419

420 *Image analysis*

421

422  $S_{\text{green}}$ , which is the strength of the green channel relative to the total of all three color channels,  
423 was previously found to correlate highly ( $R^2 \geq 0.63$ ,  $p < .001$ ) with anthocyanin concentration  
424 across a range of taxa and plant tissues (del Valle et al. 2018). This is because anthocyanin  
425 absorbs light in the green region of the visible spectrum. The index,  $S_{\text{green}}$ , is given by:

426

427 
$$S_{\text{green}} = N_{\text{green}} / (N_{\text{green}} + N_{\text{blue}} + N_{\text{red}})$$

428

429 where N is the intensity value for the green, blue, or red color channel (del Valle et al. 2018).

430

431 A custom Python program imported the RAW image files for processing. The Python program  
432 used a modified version of the MacDuff color chart detection algorithm  
433 (<https://github.com/mathandy/python-macduff-colorchecker-detector>) to automatically detect the  
434 panels of known broad-spectrum reflectance values on a reference color chart. Image pixel values  
435 were converted into normalized reflectance values based on a linear fit of the red, green, and blue  
436 signal strengths in those panels of known reflectance. The program then averages the relative  
437 greenness ( $S_{\text{green}}$ ) value over all pixels of the annotated region of interest minus a circular region  
438 20 pixels in radius at the injection site, which typically exhibited tissue damage from the injection  
439 syringe. This yielded a single  $S_{\text{green}}$  value for each sample.

440

441  $S_{\text{green}}$  values were analyzed in R 4.1.2 using one-way ANOVAs, followed by Tukey post hoc tests  
442 when differences across treatments were discovered. A substantial number of leaves infiltrated

443 with *MYB5a* did not produce visible quantities of red pigmentation. These were categorized as  
444 “no visible pigment” if their  $S_{\text{green}}$  values showed them to have equal or lower amounts of red  
445 pigmentation than the average of all the negative controls; this categorization corresponded well  
446 with a “by-eye” assessment. Data were analyzed both with and without these apparently-  
447 unsuccessful infiltrations. Rates of success were compared between the *luteus* and *variegatus*  
448 transgenes using a  $X^2$  contingency test in R 4.1.2.

449

#### 450 *Data availability*

451

452 A detailed transient-transformation methods video is available upon request. Images of all  
453 leaves analyzed are linked as Supplemental Figure S8.A, S8.B, and S8.C in the Supplemental  
454 Data. *MYB5a* sequences from the exon 1-2-4 splice variants of *M. l. luteus* and *M. l. variegatus*  
455 have been previously published: <https://www.ncbi.nlm.nih.gov/nucore/MT361119.1> (*M. l.*  
456 *luteus*) and <https://www.ncbi.nlm.nih.gov/nucore/2019733960> (*M. l. variegatus*). Code for  
457 image analysis is available at <https://github.com/WhitmanOptiLab/PigmentSpotting>.

458

## 459 **Results**

460

461 *Two sites in MYB5a are occasionally sequenced as guanine rather than adenine*

462

463 The locations of two putatively edited sites, in exon 4 of *M. l. variegatus MYB5a*, are shown in  
464 Figure 2, along with chromatograms from the “AA” variant versus the “GG” variant from our  
465 initial, fortuitous discovery of the sequence difference. The novel “GG” variant was found in two  
466 different sequencing reactions, originating from two cDNA synthesis reactions from a single  
467 mRNA extraction of *M. l. variegatus* young bud outer-petal tissue.

468

469 *The “GG” allele of MYB5a from M. l. variegatus is not genomically encoded*

470

471 Cloning *MYB5a* gDNA from a *variegatus* x *luteus* F1 hybrid yielded 29 colonies containing a  
472 *MYB* sequence. Of these, 13 contained the “AA” variant of the *M. l. variegatus* allele. The  
473 remaining 16 contained the *M. l. luteus* allele. The “GG” variant was not discovered in these  
474 genomic DNA samples.

475

476 Cloning *MYB5a* gDNA from a highly inbred line of *M. l. variegatus* yielded 37 colonies  
477 containing a *MYB* sequence. All of these were the “AA” variant of *M. l. variegatus MYB5a*. The  
478 “GG” variant was not discovered in these genomic DNA samples. Sample PCR colony screens,  
479 from both F1 hybrid gDNA and *M. l. variegatus* gDNA, are shown in Supplemental Figure S6.

480

481 After collecting new floral bud tissues, and cloning and sequencing *MYB5a* cDNA from them, we  
482 identified one additional colony containing a G at the edited site encompassed by our primers  
483 (Table 1). As before, the variant was obtained from the petal lobes (“outer petal”) of *M. l.*  
484 *variegatus*. The other 29 *M. l. variegatus* colonies contained the “AA” variant. In *M. l. variegatus*,  
485 only the exon 1-2-4 splice variant was recovered, as expected based on the utilization of  
486 primers Myb5\_64F and Myb5\_57R (Supplemental Figure S5). These same primers were,  
487 however, competent to amplify both 1-2-3 and 1-2-4 splice variants from *M. l. luteus*, and they  
488 did. We found 28 colonies containing the exon 1-2-4 splice variant of *M. l. luteus MYB5a*, and  
489 13 containing the exon 1-2-3 splice variant, with both splice variants appearing in both inner and  
490 outer petal tissue (Table 1).

491

492 Recovering *M. l. luteus MYB5a* sequence from outer petal tissue was unexpected, and may  
493 reflect imprecise separation of the two tissue types during floral bud dissection. The finding is

494 consistent with RT-PCR of *MYB5a* from our four cDNA samples, which indicated some  
495 expression of the gene in the *M. l. luteus* outer petal sample (Supplemental Figure S7).

496

497

498 **Table 1. Sequencing *MYB5a* cDNA from *M. l. luteus* and *M. l. variegatus* developing flower bud**

499 **tissue identifies splice variants in *M. l. luteus*, and sequence variants in *M. l. variegatus*.** “Inner

500 petal” corresponds to the nectar-guide-spotted throat region of the flower; “outer petal” corresponds to the

501 petal lobes.

| <i>MYB5a</i> variant | <i>luteus</i> inner petal | <i>luteus</i> outer petal | <i>variegatus</i> inner petal | <i>variegatus</i> outer petal |
|----------------------|---------------------------|---------------------------|-------------------------------|-------------------------------|
| Exons 1-2-4 with “A” | 17                        | 11                        | 10                            | 19                            |
| Exons 1-2-4 with “G” | -                         | -                         | -                             | 1                             |
| Exons 1-2-3          | 10                        | 3                         | -                             | -                             |

502

503 *Infiltration of transgenes into N. tabacum leaves*

504 Of the 124 leaves that received paired infiltrations of the 1-2-4 splice variant of *MYB5a* (*M. l.*

505 *variegatus* on one side of the central vein, and *M. l. luteus* on the other), 26 were eliminated due

506 to tearing or inadvertent marking over the pigmented area. The remaining 98 were scored for

507 the presence of visible anthocyanin pigmentation, and also quantitatively analyzed for pigment

508 abundance. Of the 25 leaves infiltrated on each side of the midvein with pGFP<sub>Gus</sub>Plus as a

509 negative control, five were eliminated due to tearing or marking errors and the remaining 20

510 leaves (40 infiltrations) were quantitatively analyzed for anthocyanin pigment abundance

511 (Supplemental Figure S8).

512

513 *MYB5a from both M. l. luteus and M. l. variegatus drives strong anthocyanin production*

514

515 Both *MYB5a* transgenes resulted in significantly redder leaf tissue, as indicated by lower  $S_{\text{green}}$   
516 values, than did the negative control (Figure 3 and 4;  $F(2, 233) = 12.43$ ;  $p < 0.0001$ ). Surprisingly,  
517 the allele of *MYB5a* from the yellow-flowered *M. l. luteus* appeared to drive significantly greater  
518 anthocyanin production than the corresponding allele from the magenta-flowered *M. l.*  
519 *variegatus* (Tukey's post hoc test:  $p = 0.0102$ ).

520

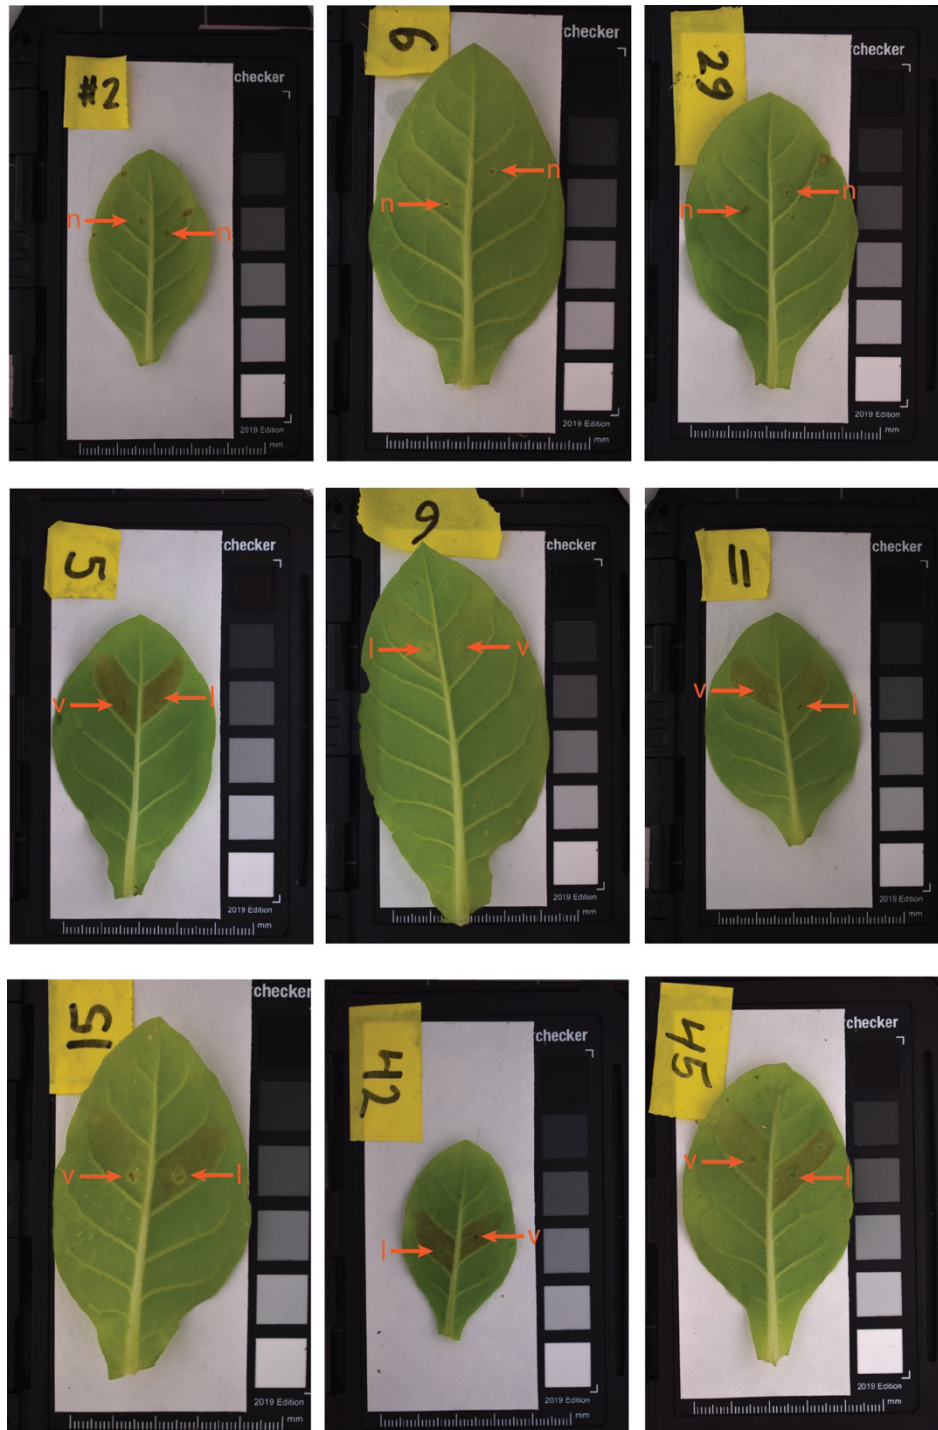

521

522 **Figure 3. *MYB5a* transgenes yielded a range of anthocyanin biosynthesis levels in *N. tabacum***

523 **leaves.** In each image, the injection site is indicated with an arrow, labeled as n (negative control), l

524 (*luteus* allele of *MYB5a*), or v (*variegatus* allele of *MYB5a*). Leaf photos for this figure were uniformly



525 brightened by 30% in Powerpoint to make anthocyanin pigmentation and injection sites easier to see,  
526 although analyses were performed on un-brightened images.  
527

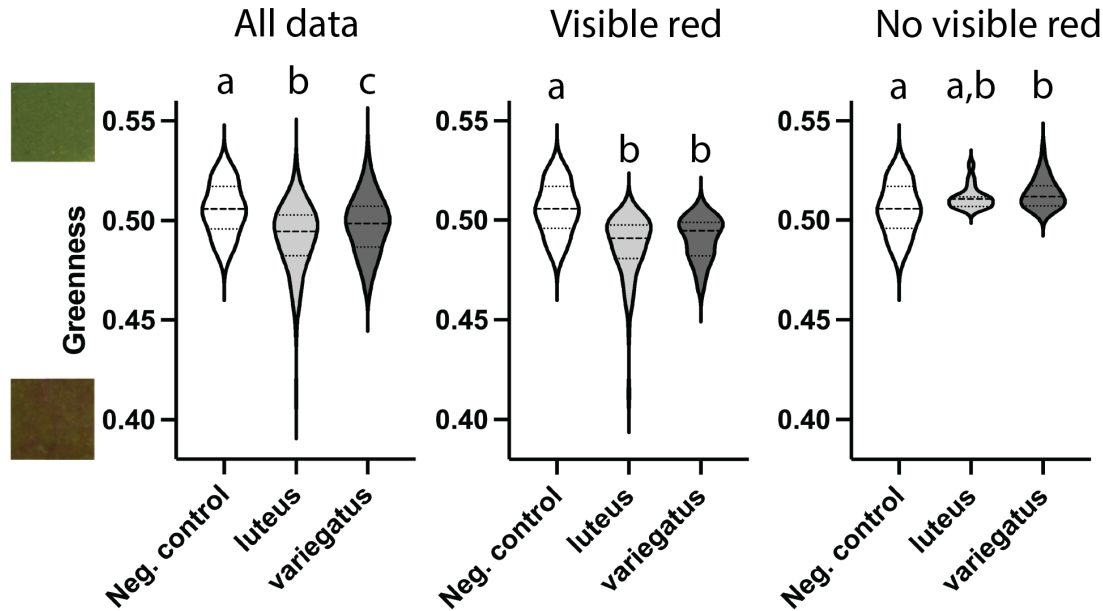

528  
529 **Figure 4. *MYB5a* alleles from both the yellow-petaled *M. luteus* and the magenta-petaled *M. l.***  
530 ***variegatus* drive production of red anthocyanin pigmentation in *N. tabacum* leaf tissue.** Left, data  
531 from all samples. Center, pGFP negative control compared to only those *luteus* and *variegatus* samples  
532 that produced visible amounts of red pigmentation. Right, pGFP negative control compared to those  
533 *luteus* and *variegatus* samples that did not produce visible amounts of red pigmentation. Each graph is a  
534 violin plot with the median shown as a dashed line and the first and third quartiles as dotted lines. On the  
535 Y-axis, low values correspond to redder leaf tissue and high values correspond to greener tissue. Color  
536 swatches on the Y-axis were taken from injection sites with  $S_{\text{green}}$  values of 0.53 and 0.41 respectively.  
537 Swatches were taken from leaf photos that had been uniformly brightened by 30% in Powerpoint, to  
538 maintain consistency with the previous figure, although analyses were performed on un-brightened  
539 images. Letters a, b, and c are significance groupings at  $p < 0.05$ .

540  
541 However, this result may have been influenced by different rates of infiltration success, rather  
542 than by different quantities of pigment produced in successful infiltration events. Overall, 79/98



543 *luteus* infiltrations, but only 67/98 *variegatus* infiltrations, resulted in the accumulation of visible  
544 anthocyanin pigmentation in a tobacco leaf (Table 2). The difference in success rate between  
545 the two alleles approached but did not reach statistical significance ( $\chi^2 = 3.249$ ,  $df = 1$ ,  $p =$   
546 0.0715).

547

548 **Table 2. The *M. l. luteus* allele of *MYB5a* more often produced visible anthocyanin pigmentation in**  
549 **tobacco leaves than did the *M. l. variegatus* allele, although the difference is not statistically**  
550 **significant.  $\chi^2 = 3.249$ ,  $df = 1$ ,  $p = 0.0715$ .**

| Transgene               | Leaves with visible anthocyanin | Leaves without visible anthocyanin |
|-------------------------|---------------------------------|------------------------------------|
| <i>luteus MYB5a</i>     | 79                              | 19                                 |
| <i>variegatus MYB5a</i> | 67                              | 31                                 |

551

552 To exclude possible effects of varying infiltration success, we analyzed pigment production only  
553 from the infiltrations that produced visible amounts of leaf anthocyanin pigment (Figure 4 center  
554 panel;  $F(2,183)=27.32$ ,  $p<0.0001$ ). In this subset of the data, the *luteus* and *variegatus*  
555 transgenes were quite similar, and both drove significantly more anthocyanin pigmentation than  
556 did the negative control (Tukey's post hoc:  $p<0.0001$  for both *luteus* and *variegatus* compared to  
557 the negative control).

558

559 In the excluded infiltrations (Figure 4 right panel;  $F(2,87)=6.731$ ,  $p=0.00191$ ), leaf tissues  
560 containing the *luteus* and *variegatus* transgenes were statistically indistinguishable from each  
561 other according to a Tukey's post hoc test, and slightly less red (higher  $S_{\text{green}}$  value) than the  
562 negative control.

563

564

565 **Discussion**

566

567 When closely related taxa show phenotypic divergence, is the molecular mechanism a  
568 mutational difference in the protein-coding region of a gene, or in the noncoding, *cis*-regulatory  
569 region? We used transient transgenic assays to investigate this question for the MYB5a  
570 anthocyanin-activating transcription factor from two varieties of monkeyflower: the yellow-  
571 flowered *Mimulus luteus* var. *luteus*, which lacks anthocyanin pigment in its petal lobes, and the  
572 magenta-flowered *M. l. variegatus*, which recently evolved petal lobe anthocyanin via an  
573 unknown change within the *MYB5a* gene. Using quantitative image-analysis based methods, we  
574 report that the two protein-coding regions are functionally equivalent at driving the production of  
575 anthocyanin pigment in a heterologous tobacco-leaf system. Together with a previous finding  
576 that *MYB5a* is more strongly expressed in *M. l. variegatus* petal lobes than in its conspecific  
577 (Zheng et al. 2021), this result strongly indicates that *cis*-regulatory evolution is responsible for  
578 the recent gain of pigmentation in *M. l. variegatus*.

579

580 *Improved tools for rapid transgenic assays in Mimulus*

581

582 The success of the two *Mimulus* transgenes at activating anthocyanin production in *N. tabacum*  
583 is encouraging for future functional studies in *Mimulus*, though not unprecedented. One factor  
584 that can limit the ability of a MYB to function in a heterologous system is the availability of a  
585 functional bHLH co-factor. In some cases, co-expression of the focal MYB gene's native bHLH  
586 partner has been necessary for successful anthocyanin activation (Espley et al., 2009; Lin-  
587 Wang et al., 2010), but in other cases, anthocyanins have been induced in *N. tabacum* without  
588 also expressing bHLH from the same system (Fraser et. al., 2013). In one such study,  
589 Montefiori et. al. (2015) expressed *AcMyb110* from Kiwifruit (*Actinidia* sp., order Ericales) in *N.*

590 *tabacum* leaves and successfully stimulated anthocyanin production. They identified two  
591 endogenous bHLH transcription factors in *N. tabacum*, NtJAF13 and NtAN1, that associated  
592 with AcMYB110 to stimulate expression of anthocyanin biosynthetic pathway genes, and that  
593 may also have interacted with the *Mimulus* MYB5a protein in our experiment.

594

595 One caveat to the finding of equivalence between the *luteus* and *variegatus* transgenes is that  
596 the high levels of expression typically used in transgenic assays may obscure subtle differences  
597 in protein function that only appear at lower concentrations (Koes et. al., 2005). It is possible that  
598 other types of analyses could demonstrate a difference in molecular function between the two  
599 alleles. Developing a more closely related species as a platform for functional tests would also be  
600 beneficial. In our hands, preliminary tests with both *M. luteus* and congener *M. lewisii* resulted in  
601 high levels of tissue death and damage, but the latter appears to have promise as a host for  
602 transient transgenic assays (Ding and Yuan 2016).

603

604 Using *N. tabacum* for direct side-by-side comparison of *Agrobacterium*-delivered transgenes was  
605 first reported by Van der Hoorn et. al. (2000). This strategy takes advantage of leaf symmetry and  
606 the clearly delineated leaf sectors in *N. tabacum* to compare two genes side-by-side in an identical  
607 biological background. Coupled with a nondestructive way to quantify the resulting phenotype, we  
608 believe this remains an underutilized strategy for functional comparisons between genes.

609

610 *Possible A-to-I editing of mRNA*

611

612 In the process of building *MYB5a* overexpression transgenes, we discovered what appears to  
613 be the first documented case, to our knowledge, of post-transcriptional editing in an  
614 anthocyanin-related gene. Two sites within the *M. l. variegatus* allele are encoded as adenine in

615 the genome, yet occasionally produce mRNA sequences that read as a guanine in Sanger  
616 sequencing.

617

618 Inosine is a guanine analog, most often created in cells by the deamination of adenine  
619 (Srinivasan et al., 2021), that is reported as guanine in Sanger sequencing (Cattenoz et al.,  
620 2013). Adenine-to-inosine (A-to-I) editing was first discovered in *Xenopus laevis* mRNA by Bass  
621 and Weintraub (1988), and is abundant in metazoans (Cattenoz et al., 2013), with one study  
622 predicting over 36,000 A-to-I editing sites in the human genome (Li et al., 2009).

623

624 Although A-to-I editing of mRNA transcripts does not yet appear to have been directly  
625 investigated in plants, we hypothesize that the two new bases are in fact inosine, given that  
626 inosine is reported as guanine by Sanger sequencing (Cattenoz et al., 2013). Nuclear A-to-I  
627 post-transcriptional editing has been reported in plant tRNA (Delannoy et al., 2009; Karcher and  
628 Bock 2009; Zhou et al., 2014), and the deaminase enzymes required for A-to-I editing have  
629 been putatively discovered in *Arabidopsis thaliana* (Zhou et al., 2014). Though mRNA A-to-I  
630 editing has not been described in plants, it is widespread across the domains of life, including  
631 fungi (reviewed in Teichert 2018), animals (reviewed in Knoop 2011), and bacteria (first reported  
632 by Bar-Yaacov et al., 2017).

633

634 In contrast, reports of A-to-G editing in plants appear to be based solely on sequencing-based  
635 approaches that would report inosines incorrectly as guanines (Pan et al., 2022), with A-to-I  
636 editing apparently first proposed by Meng et al. (2010) on the basis of A-to-"G" mRNA editing  
637 discovered by sequencing plant transcriptomes. True A-to-G editing does not appear to be a  
638 verified biological phenomenon in any taxon. We therefore consider A-to-G editing to be less  
639 likely than A-to-I editing in our study.

640

641 A variety of methods exist for confirming A-to-I editing, including chromatographic approaches  
642 (Wolf et al., 2002; Chan et al., 2010) and “inosine chemical erasing” (ICE)-Seq (Sakurai et al.,  
643 2010). However, A-to-I editing is commonly detected and quantified by the simple method used  
644 here, in which reverse transcription and sequencing of mRNA reveals unexpected “guanines” in  
645 some proportion of transcripts (e.g. Gu et al., 2012).

646  
647 When inosine is present in tRNA, it can pair promiscuously with A, C, or U. In mRNA transcripts,  
648 in contrast, it is translated as though it were guanine (Srinivasan et al. 2021). Regardless of  
649 whether the edited bases result in guanine or inosine, then, they are likely to be interpreted by  
650 the translational machinery of the cell as guanine. In the *M. l. variegatus* allele of *MYB5a*, both  
651 edited sites would result in an amino acid change: from asparagine to serine at nucleotide  
652 position 584, and from glutamic acid to glycine at position 686.

653  
654 How conservative are these changes? One metric is Grantham’s Distance, based on  
655 composition, polarity and molecular volume (Grantham 1974). Using this metric, amino acid  
656 pairs have similarity scores ranging from 5 for the highly similar leucine-isoleucine pair to a  
657 maximum of 215 for cysteine-tryptophan. The first putative editing site reported here  
658 (asparagine-serine, both of which have polar side chains) has a modest Grantham’s Distance of  
659 46. The putative glutamic acid to glycine substitution - replacing a negatively charged side chain  
660 with a single hydrogen - has a larger Grantham’s Distance of 98. The implications for *MYB5a*  
661 protein folding and function are, however, unknown. Overall, the mechanisms for A-to-I (or A-to-  
662 G) editing in plant mRNAs, and their functional impacts, comprise a barely-explored area within  
663 plant molecular biology, which seems likely to yield new discoveries upon further investigation.  
664 Nanopore native RNA sequencing methods, recently used by Nguyen et. al. (2022) to globally  
665 identify inosine in human, mouse, and *Xenopus* transcriptomes, might be applied fruitfully to  
666 plant transcriptomes with the same aim.

667

668

## 669 **Conclusions**

670

671 *Mimulus luteus* var. *luteus* and *M. l. variegatus* differ strikingly in floral phenotype, thanks to a  
672 derived loss of yellow carotenoid pigment and gain of magenta cyanidin pigment in the latter.  
673 The expansion of cyanidin to the petal lobes of *M. l. variegatus* has previously been tracked to  
674 the *MYB5a* transcription factor gene, for which the patterns of petal expression correlate well  
675 with the presence versus absence of cyanidin pigment. Here, we use transient transgenics  
676 coupled with quantitative digital image analysis to show that the protein-coding regions of  
677 *MYB5a* are functionally indistinguishable between the taxa, when tested in the heterologous  
678 *Nicotiana tabacum* system. This finding adds further support to the hypothesis that evolution in  
679 *cis* to *MYB5a* is the molecular mechanism for the gain of this novel anthocyanin trait in *M. l.*  
680 *variegatus*.

681

682 We additionally report the discovery of what appears to be post-transcriptional mRNA editing.  
683 The edits are reported as A-to-G by Sanger sequencing, but we argue that A-to-I editing is more  
684 likely based on what is known about RNA editing in plants and other organisms. Overall, our  
685 work highlights the utility of floral diversification for identifying the molecular mechanisms of  
686 evolution, as well as the scope for continued new discoveries in the realm of plant molecular  
687 genetics.

688

## 689 **Acknowledgements and Funding**

690

691 The authors thank N. Forsthoefel, B. Ding, and Y.-W. Yuan for assistance with and advice on  
692 the transgenic techniques. We thank D. Vernon, B. Moss, J. Puzey, and their students for

693 discussion of some of the results presented here. AMC was supported by NSF-DEB-1655311,  
694 NSF-DEB-1754075, and NSF-IOS-2031272. AEP was additionally supported by a Whitman  
695 College Abshire Award for undergraduate research.

696

## 697 **References**

698

699 Barker, W. R., G. L. Nesom, P. M. Beardsley, and N. S. Fraga. 2012. A taxonomic  
700 conspectus of Phrymaceae: a narrowed circumscription for *Mimulus*, new and  
701 resurrected genera, and new names and combinations. *Phytoneuron* 39:1–60.

702 Bar-Yaacov, D., E. Mordret, R. Towers, T. Biniashvili, C. Soyris, S. Schwartz, O. Dahan,  
703 and Y. Pilpel. 2017. RNA editing in bacteria recodes multiple proteins and regulates an  
704 evolutionarily conserved toxin-antitoxin system. *Genome Res.* 27:1696–1703.

705 Bass, B. L., and H. Weintraub. 1988. An unwinding activity that covalently modifies its  
706 double-stranded RNA substrate. *Cell* 55:1089–1098.

707 Beardsley, P. M., and R. G. Olmstead. 2002. Redefining Phrymaceae: the placement of  
708 *Mimulus*, tribe Mimuleae, and *Phryma*. *Am. J. Bot.* 89:1093–1102.

709 Cattenoz, P. B., R. J. Taft, E. Westhof, and J. S. Mattick. 2013. Transcriptome-wide  
710 identification of A > I RNA editing sites by inosine specific cleavage. *RNA* 19:257–270.

711 Chan, C. T. Y., M. Dyavaiah, M. S. DeMott, K. Taghizadeh, P. C. Dedon, and T. J. Begley.  
712 2010. A Quantitative Systems Approach Reveals Dynamic Control of tRNA  
713 Modifications during Cellular Stress. *PLoS Genet* 6:e1001247.

714 Cooley, A. M., G. Carvallo, and J. H. Willis. 2008. Is Floral Diversification Associated with  
715 Pollinator Divergence? Flower Shape, Flower Colour and Pollinator Preference in  
716 Chilean *Mimulus*. *Annals of Botany* 101:641–650.

717 Cooley, A. M., J. L. Modliszewski, M. L. Rommel, and J. H. Willis. 2011. Gene Duplication  
718 in *Mimulus* Underlies Parallel Floral Evolution via Independent trans-Regulatory  
719 Changes. *Current Biology* 21:700–704.

720 Cooley, A. M., and J. H. Willis. 2009. Genetic divergence causes parallel evolution of flower  
721 color in Chilean *Mimulus*. *New Phytologist* 183:729–739.

722 Davies, K. M., N. W. Albert, and K. E. Schwinn. 2012. From landing lights to mimicry: the  
723 molecular regulation of flower colouration and mechanisms for pigmentation patterning.  
724 *Functional Plant Biol.* 39:619.

725 del Valle, J. C., A. Gallardo-López, M. L. Buide, J. B. Whittall, and E. Narbona. 2018. Digital  
726 photography provides a fast, reliable, and noninvasive method to estimate anthocyanin  
727 pigment concentration in reproductive and vegetative plant tissues. *Ecol Evol* 8:3064–  
728 3076.

729 Delannoy, E., M. Le Ret, E. Faivre-Nitschke, G. M. Estavillo, M. Bergdoll, N. L. Taylor, B. J.  
730 Pogson, I. Small, P. Imbault, and J. M. Gualberto. 2009. *Arabidopsis* tRNA Adenosine  
731 Deaminase Arginine Edits the Wobble Nucleotide of Chloroplast tRNA<sup>Arg</sup>(ACG) and Is  
732 Essential for Efficient Chloroplast Translation. *The Plant Cell* 21:2058–2071.

733 Ding, B., and Y.-W. Yuan. 2016. Testing the utility of fluorescent proteins in *Mimulus lewisii*  
734 by an *Agrobacterium*-mediated transient assay. *Plant Cell Rep* 35:771–777.

735 Dubos, C., R. Stracke, E. Grotewold, B. Weisshaar, C. Martin, and L. Lepiniec. 2010. MYB  
736 transcription factors in *Arabidopsis*. *Trends in Plant Science* 15:573–581.

737 Durbin, M. 2003. Genes that determine flower color: the role of regulatory changes in the  
738 evolution of phenotypic adaptations. *Molecular Phylogenetics and Evolution* 29:507–  
739 518.

740 Edger, P. P., R. Smith, M. R. McKain, A. M. Cooley, M. Vallejo-Marin, Y. Yuan, A. J.  
741 Bewick, L. Ji, A. E. Platts, M. J. Bowman, K. L. Childs, J. D. Washburn, R. J. Schmitz,  
742 G. D. Smith, J. C. Pires, and J. R. Puzey. 2017. Subgenome Dominance in an



743 Interspecific Hybrid, Synthetic Allopolyploid, and a 140-Year-Old Naturally Established  
744 Neo-Allopolyploid Monkeyflower. *Plant Cell* 29:2150–2167.

745 Espley, R. V., C. Brendolise, D. Chagné, S. Kutty-Amma, S. Green, R. Volz, J. Putterill, H.  
746 J. Schouten, S. E. Gardiner, R. P. Hellens, and A. C. Allan. 2009. Multiple Repeats of a  
747 Promoter Segment Causes Transcription Factor Autoregulation in Red Apples. *The*  
748 *Plant Cell* 21:168–183.

749 Feller, A., K. Machemer, E. L. Braun, and E. Grotewold. 2011. Evolutionary and  
750 comparative analysis of MYB and bHLH plant transcription factors: Plant MYB and  
751 bHLH factors. *The Plant Journal* 66:94–116.

752 Fraser, L. G., A. G. Seal, M. Montefiori, T. K. McGhie, G. K. Tsang, P. M. Datson, E.  
753 Hilario, H. E. Marsh, J. K. Dunn, R. P. Hellens, K. M. Davies, M. A. McNeilage, H. N. D.  
754 Silva, and A. C. Allan. 2013. An R2R3 MYB transcription factor determines red petal  
755 colour in an *Actinidia* (kiwifruit) hybrid population. *BMC Genomics* 14:28.

756 Grantham, R. 1974. Amino Acid Difference Formula to Help Explain Protein Evolution.  
757 *Science* 185:862–864.

758 Grotewold, E. 2006. The genetics and biochemistry of floral pigments. *Annu. Rev. Plant*  
759 *Biol.* 57:761–780.

760 Gu, T., F. W. Buaas, A. K. Simons, C. L. Ackert-Bicknell, R. E. Braun, and M. A. Hibbs.  
761 2012. Canonical A-to-I and C-to-U RNA Editing Is Enriched at 3'UTRs and microRNA  
762 Target Sites in Multiple Mouse Tissues. *PLoS ONE* 7:e33720.

763 Hoekstra, H. E., and J. A. Coyne. 2007. The Locus of Evolution: Evo Devo and the  
764 Genetics of Adaptation. *Evolution* 61:995–1016.

765 Kapila, J., R. De Rycke, M. Van Montagu, and G. Angenon. 1997. An *Agrobacterium*-  
766 mediated transient gene expression system for intact leaves. *Plant Science* 122:101–  
767 108.

- 768 Karcher, D., and R. Bock. 2009. Identification of the chloroplast adenosine-to-inosine tRNA  
769 editing enzyme. *RNA* 15:1251–1257.
- 770 Knoop, V. 2011. When you can't trust the DNA: RNA editing changes transcript sequences.  
771 *Cell. Mol. Life Sci.* 68:567–586.
- 772 Koes, R., W. Verweij, and F. Quattrocchio. 2005. Flavonoids: a colorful model for the  
773 regulation and evolution of biochemical pathways. *Trends in Plant Science* 10:236–  
774 242.
- 775 LaFountain, A. M., and Y. Yuan. 2021. Repressors of anthocyanin biosynthesis. *New*  
776 *Phytol* 231:933–949.
- 777 Li, C., W. Yu, J. Xu, X. Lu, and Y. Liu. 2022. Anthocyanin Biosynthesis Induced by MYB  
778 Transcription Factors in Plants. *IJMS* 23:11701.
- 779 Li, J. B., E. Y. Levanon, J.-K. Yoon, J. Aach, B. Xie, E. LeProust, K. Zhang, Y. Gao, and G.  
780 M. Church. 2009a. Genome-Wide Identification of Human RNA Editing Sites by  
781 Parallel DNA Capturing and Sequencing. *Science* 324:1210–1213.
- 782 Li, J.-F., E. Park, A. G. von Arnim, and A. Nebenführ. 2009b. The FAST technique: a  
783 simplified *Agrobacterium*-based transformation method for transient gene expression  
784 analysis in seedlings of *Arabidopsis* and other plant species. *Plant Methods* 5:6.
- 785 Lin-Wang, K., K. Bolitho, K. Grafton, A. Kortstee, S. Karunairetnam, T. K. McGhie, R. V.  
786 Espley, R. P. Hellens, and A. C. Allan. 2010. An R2R3 MYB transcription factor  
787 associated with regulation of the anthocyanin biosynthetic pathway in Rosaceae. *BMC*  
788 *Plant Biol* 10:50.
- 789 Lowry, D. B., J. M. Sobel, A. L. Angert, T. Ashman, R. L. Baker, B. K. Blackman, Y.  
790 Brandvain, K. J. R. P. Byers, A. M. Cooley, J. M. Coughlan, M. R. Dudash, C. B.  
791 Fenster, K. G. Ferris, L. Fishman, J. Friedman, D. L. Grossenbacher, L. M. Holeski, C.  
792 T. Ivey, K. M. Kay, V. A. Koelling, N. J. Kooyers, C. J. Murren, C. D. Muir, T. C. Nelson,  
793 M. L. Peterson, J. R. Puzey, M. C. Rotter, J. R. Seemann, J. P. Sexton, S. N. Sheth,

794 M. A. Streisfeld, A. L. Sweigart, A. D. Twyford, M. Vallejo-Marín, J. H. Willis, K. M.  
795 Wright, C. A. Wu, and Y. Yuan. 2019. The case for the continued use of the genus  
796 name *Mimulus* for all monkeyflowers. *TAXON* 68:617–623.

797 Meng, Y., D. Chen, Y. Jin, C. Mao, P. Wu, and M. Chen. 2010. RNA editing of nuclear  
798 transcripts in *Arabidopsis thaliana*. *BMC Genomics* 11:S12.

799 Montefiori, M., C. Brendolise, A. P. Dare, K. Lin-Wang, K. M. Davies, R. P. Hellens, and A.  
800 C. Allan. 2015. In the Solanaceae, a hierarchy of bHLHs confer distinct target  
801 specificity to the anthocyanin regulatory complex. *Journal of Experimental Botany*  
802 66:1427–1436.

803 Nguyen, T. A., J. W. J. Heng, P. Kaewsapsak, E. P. L. Kok, D. Stanojević, H. Liu, A.  
804 Cardilla, A. Praditya, Z. Yi, M. Lin, J. G. A. Aw, Y. Y. Ho, K. L. E. Peh, Y. Wang, Q.  
805 Zhong, J. Heraud-Farlow, S. Xue, B. Reversade, C. Walkley, Y. S. Ho, M. Šikić, Y.  
806 Wan, and M. H. Tan. 2022. Direct identification of A-to-I editing sites with nanopore  
807 native RNA sequencing. *Nat Methods* 19:833–844.

808 Pan, Y., M. Li, J. Huang, W. Pan, T. Shi, Q. Guo, G. Yang, and X. Nie. 2022. Genome-  
809 Wide Identification and Characterization of RNA/DNA Differences Associated with  
810 Drought Response in Wheat. *IJMS* 23:1405.

811 Puzey, J. R., J. H. Willis, and J. K. Kelly. 2017. Population structure and local selection  
812 yield high genomic variation in *Mimulus guttatus*. *Mol Ecol* 26:519–535.

813 Quattrocchio, F., W. Verweij, A. Kroon, C. Spelt, J. Mol, and R. Koes. 2006. PH4 of *Petunia*  
814 Is an R2R3 MYB Protein That Activates Vacuolar Acidification through Interactions with  
815 Basic-Helix-Loop-Helix Transcription Factors of the Anthocyanin Pathway. *The Plant*  
816 *Cell* 18:1274–1291.

817 Sakurai, M., T. Yano, H. Kawabata, H. Ueda, and T. Suzuki. 2010. Inosine cyanoethylation  
818 identifies A-to-I RNA editing sites in the human transcriptome. *Nat Chem Biol* 6:733–  
819 740.

- 820 Schöb, H., C. Kunz, and F. Meins. 1997. Silencing of transgenes introduced into leaves by  
821 agroinfiltration: a simple, rapid method for investigating sequence requirements for  
822 gene silencing. *Mol Gen Genet* 256:581–585.
- 823 Sobel, J. M., and M. A. Streisfeld. 2013. Flower color as a model system for studies of plant  
824 evo-devo. *Front. Plant Sci.* 4.
- 825 Sparkes, I. A., J. Runions, A. Kearns, and C. Hawes. 2006. Rapid, transient expression of  
826 fluorescent fusion proteins in tobacco plants and generation of stably transformed  
827 plants. *Nat Protoc* 1:2019–2025.
- 828 Srinivasan, S., A. G. Torres, and L. Ribas de Pouplana. 2021. Inosine in Biology and  
829 Disease. *Genes* 12:600.
- 830 Stern, D. L., and V. Orgogozo. 2008. The Loci of Evolution: How Predictable Is Genetic  
831 Evolution? *Evolution* 62:2155–2177.
- 832 Stracke, R., M. Werber, and B. Weisshaar. 2001. The R2R3-MYB gene family in  
833 *Arabidopsis thaliana*. *Current Opinion in Plant Biology* 4:447–456.
- 834 Streisfeld, M. A., and M. D. Rausher. 2011. Population genetics, pleiotropy, and the  
835 preferential fixation of mutations during adaptive evolution. *Evolution* 65:629–642.
- 836 Teichert, I. 2018. Adenosine to inosine mRNA editing in fungi and how it may relate to  
837 fungal pathogenesis. *PLoS Pathog* 14:e1007231.
- 838 Tian, J., J. Zhang, Z. Han, T. Song, J. Li, Y. Wang, and Y. Yao. 2017. McMYB12  
839 Transcription Factors Co-regulate Proanthocyanidin and Anthocyanin Biosynthesis in  
840 *Malus Crabapple*. *Sci Rep* 7:43715.
- 841 Wittkopp, P. J., B. K. Haerum, and A. G. Clark. 2008. Regulatory changes underlying  
842 expression differences within and between *Drosophila* species. *Nat Genet* 40:346–350.
- 843 Wolf, J. 2002. *tadA*, an essential tRNA-specific adenosine deaminase from *Escherichia coli*.  
844 *The EMBO Journal* 21:3841–3851.

- 845 Wray, G. A. 2007. The evolutionary significance of cis-regulatory mutations. *Nat Rev Genet*  
846 8:206–216.
- 847 Wu, C. A., D. B. Lowry, A. M. Cooley, K. M. Wright, Y. W. Lee, and J. H. Willis. 2008.  
848 *Mimulus* is an emerging model system for the integration of ecological and genomic  
849 studies. *Heredity* 100:220–230.
- 850 Yang, Y., R. Li, and M. Qi. 2000. In vivo analysis of plant promoters and transcription  
851 factors by agroinfiltration of tobacco leaves. *Plant J* 22:543–551.
- 852 Yuan, Y. 2019. Monkeyflowers (*Mimulus*): new model for plant developmental genetics  
853 and evo-devo. *New Phytol* 222:694–700.
- 854 Yuan, Y.-W., K. J. Byers, and H. Bradshaw. 2013a. The genetic control of flower–pollinator  
855 specificity. *Current Opinion in Plant Biology* 16:422–428.
- 856 Yuan, Y.-W., J. M. Sagawa, R. C. Young, B. J. Christensen, and H. D. Bradshaw. 2013b.  
857 Genetic Dissection of a Major Anthocyanin QTL Contributing to Pollinator-Mediated  
858 Reproductive Isolation Between Sister Species of *Mimulus*. *Genetics* 194:255–263.
- 859 Zheng, X., K. Om, K. A. Stanton, D. Thomas, P. A. Cheng, A. Eggert, E. Simmons, Y.-W.  
860 Yuan, G. D. Conradi Smith, J. R. Puzey, and A. M. Cooley. 2021. The regulatory  
861 network for petal anthocyanin pigmentation is shaped by the MYB5a/NEGAN  
862 transcription factor in *Mimulus*. *Genetics* 217:iyaa036.
- 863 Zhou, W., D. Karcher, and R. Bock. 2014. Identification of Enzymes for Adenosine-to-  
864 Inosine Editing and Discovery of Cytidine-to-Uridine Editing in Nucleus-Encoded  
865 Transfer RNAs of Arabidopsis. *Plant Physiol.* 166:1985–1997.

866

867

868

869 **Supplemental tables**

870

871 **Table S1.** Primers used. F and R in primer names indicate forward and reverse primer  
 872 directions with respect to the direction of transcription. *MYB5a* primers bind to both *M. l.*  
 873 *variegatus* and *M. l. luteus* alleles unless otherwise noted.

| Primer ID | Sequence (5' to 3')      | Target                                                         | Notes                                                          |
|-----------|--------------------------|----------------------------------------------------------------|----------------------------------------------------------------|
| att-R2    | CACCACTTTGTACAAGAAAGCTG  | pEARLEYGATE vector                                             |                                                                |
| cacc_10F  | CACCTTGCAGAGCATGGAAAACAC | MYB5a, end of 5'UTR<br>through beginning of<br>coding sequence | "cacc" tag enables<br>directional cloning into<br>entry vector |
| GAPDH_1F  | TTGAAGGGAATCTTGGGCTA     | GAPDH                                                          | used as a positive<br>control                                  |
| GAPDH_2R  | CATTGACGTACCATAAACGAGT   | GAPDH                                                          | used as a positive<br>control                                  |
| M13F(-20) | GTAAAACGACGGCCAGT        | pENTR entry vector                                             |                                                                |
| M13R(-24) | AACAGCTATGACCATG         | pENTR entry vector                                             |                                                                |
| Myb5_10F  | TTGCAGAGCATGGAAAACAC     | MYB5a, end of 5'UTR<br>through beginning of<br>coding sequence |                                                                |
| Myb5_12F  | TGTAGGTGTAAGAAAAGGTGCAT  | Beginning of MYB5a<br>Exon 1, luteus allele only               |                                                                |
| Myb5_53R  | TTAATTAGGCCCCAGTAGGC     | End of MYB5a Exon 4,<br><i>variegatus</i> allele only          | includes stop codon                                            |

|                 |                         |                                             |                                           |
|-----------------|-------------------------|---------------------------------------------|-------------------------------------------|
| Myb5_57R        | CCATCTTCTGTCGTCGTAGTTTC | MYB5a Exon 4                                | can bind exon 3, though with 2 mismatches |
| Myb5_64F        | GACGGCGGCGAAATTACT      | MYB5a Exon 4                                | also binds exon 3, in luteus only         |
| Myb5_69R        | ATTAGGCCCCAGTAGGC       | End of MYB5a Exon 4, variegatus allele only | does not include stop codon               |
| pEG-35S-attB1_F | ACGCTCGAGATCACAAAGTTT   | pEARLEYGATE vector                          |                                           |

874

875

876

877 **Supplemental figures**

878

879 ***Myb3a* is present and expressed in the yellow morph of *M. cupreus*, but *Myb2* does not**  
 880 **appear to be.**

881

882 A

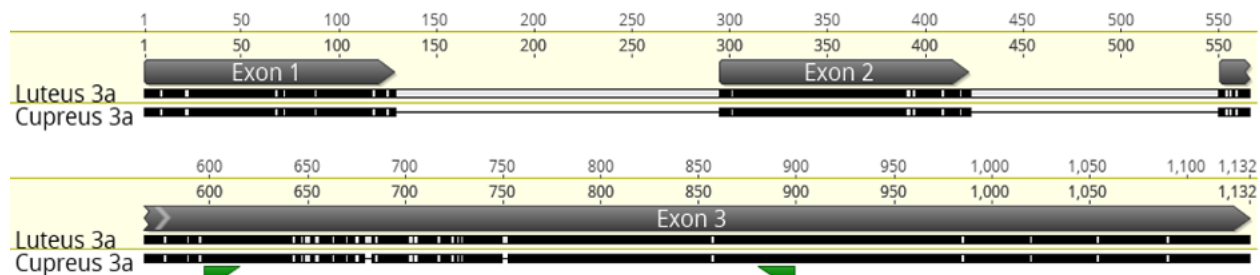

883

884 B

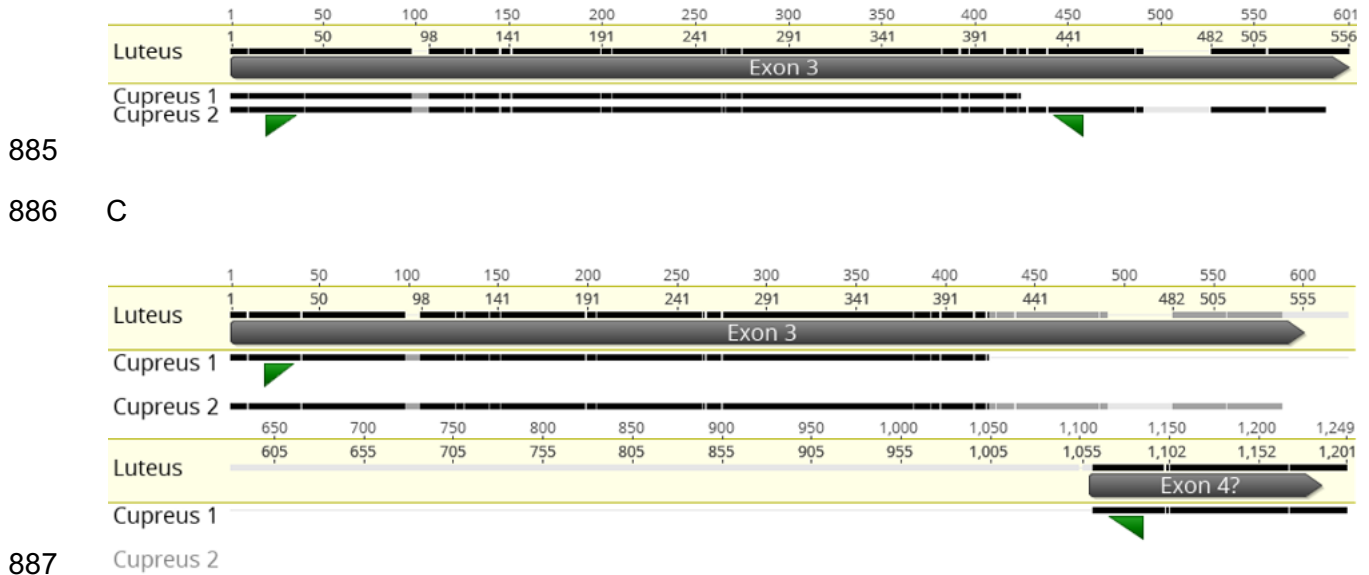

888 **Figure S1.** *Mimulus cupreus* *MYB3a* and *MYB2* transcripts aligned to *M. luteus* genomic  
 889 sequence. A. *MYB3a*. Primers Myb2/3\_1F and Myb3a\_2R are shown in green. B. *MYB2*.  
 890 Two *M. cupreus* transcripts were recovered from transcriptome sequence; the region in which  
 891 they diverge is labeled as “Cupreus 1” and “Cupreus 2,” possibly corresponding to alternative  
 892 splice variants. Primers Myb 2\_1F and Myb 2b\_5R shown in green. These primers are expected  
 893 to amplify only transcript 2. C. The same *MYB2* transcripts with primers Myb 2\_1F and Myb  
 894 2b\_7R shown in green.  
 895

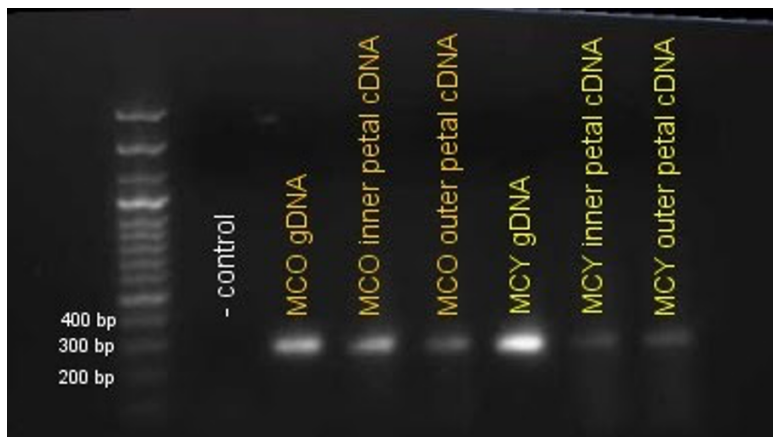

897 **Figure S2.** Primers Myb 2/3\_1F and Myb 3a\_2R were used to amplify a portion of *Myb3a* exon  
 898 3, encoding a transcription factor gene that is one of two candidates for the gain of petal



899 anthocyanin pigmentation in the orange-flowered morph of *M. cupreus* (Cooley et al., 2011).  
900 The recent loss of pigmentation in the rare yellow morph of *M. cupreus* also maps to the same  
901 region. A product of the expected length (300 bp) was amplified out of gDNA for both orange  
902 and yellow-flowered *M. cupreus*. The product was also amplified out of cDNA for both inner and  
903 outer petal tissue from both morphs, indicating that Myb 3a is expressed in all of these tissues.  
904

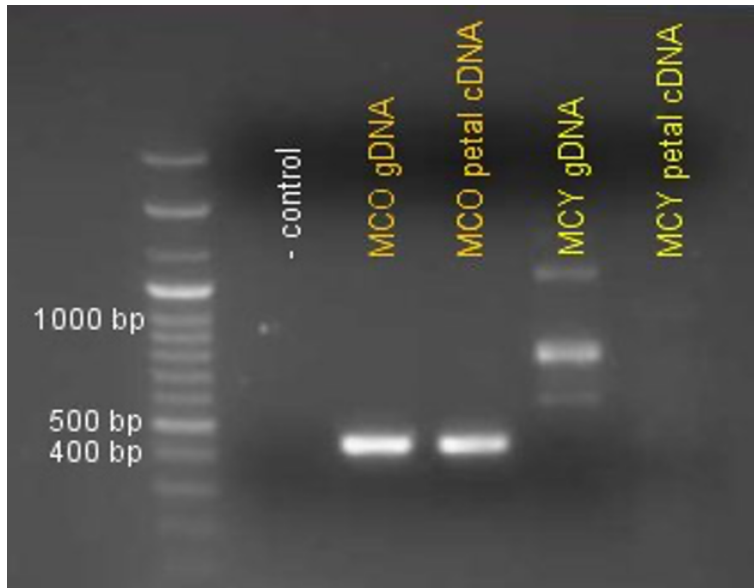

905  
906 **Figure S3.** Primers Myb 2\_1F and Myb 2b\_5R were used to amplify a portion of *Myb2* transcript  
907 2, exon 3, encoding a transcription factor gene that is the second of two candidates for the  
908 derived gain of petal anthocyanin pigmentation in the orange-flowered morph of *M. cupreus*,  
909 and the even more recent loss of petal anthocyanin in the rare yellow morph. A product of  
910 expected length (around 450 bp) was amplified out of orange-flowered *M. cupreus* gDNA. The  
911 product was also amplified out of cDNA from both inner and outer petal from orange-flowered  
912 *M. cupreus*, indicating that it is expressed in the orange morph. However, no product of the  
913 expected length was amplified out of yellow-flowered *M. cupreus* gDNA. Several longer  
914 products were amplified less brightly, and are likely due to nonspecific annealing. No product  
915 was seen in the yellow-flowered petal cDNA either.

916

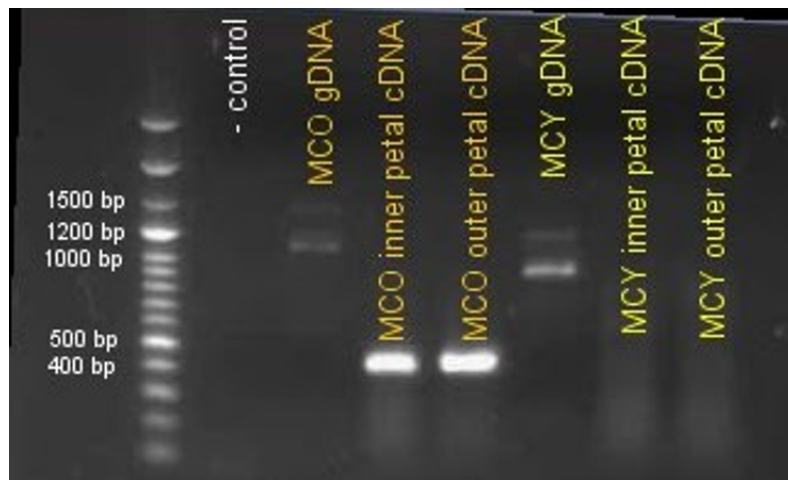

917

918 **Figure S4.** Primers Myb 2\_1F and Myb 2b\_7R were used to amplify a region of *Myb2* extending  
919 from the beginning of the third exon through the beginning of the predicted fourth exon. The  
920 expected length of the product spanning the third intron of *Myb2* was estimated to be  
921 approximately 1050 bp based on the *M. luteus* genome. A PCR amplification done using  
922 standard Taq polymerase showed bands at 1050 bp and 1500 bp in orange-flowered *M.*  
923 *cupreus* gDNA and at 950 bp and 1300 bp in yellow-flowered *M. cupreus* gDNA. Amplification  
924 using long-amp Taq polymerase revealed that a 950 bp product was also present in gDNA from  
925 orange-flowered *M. cupreus*. Sequencing of these products showed that the 1050 bp fragment  
926 from orange *M. cupreus* corresponds to *Myb2*, while the two bands seen in yellow *M. cupreus*  
927 contain sequences with no resemblance to any anthocyanin-related Myb gene. In orange-  
928 flowered *M. cupreus* cDNA from both inner and outer petal, a product of approximately 430 bp  
929 was amplified. This indicates that the transcript is spliced as expected, and is expressed in inner  
930 and outer petal tissue of orange-flowered *M. cupreus*. No product was observed in the  
931 amplification out of yellow-flowered *M. cupreus* petal cDNA, indicating that the *Myb 2b* transcript  
932 is not expressed in yellow *M. cupreus* petals.

933

934

935

936

937

938

939

940

941

942

943

944

945

946

947

948

949 ***MYB5a* from both *M. l. luteus* and *M. l. variegatus* activates anthocyanin pigmentation**

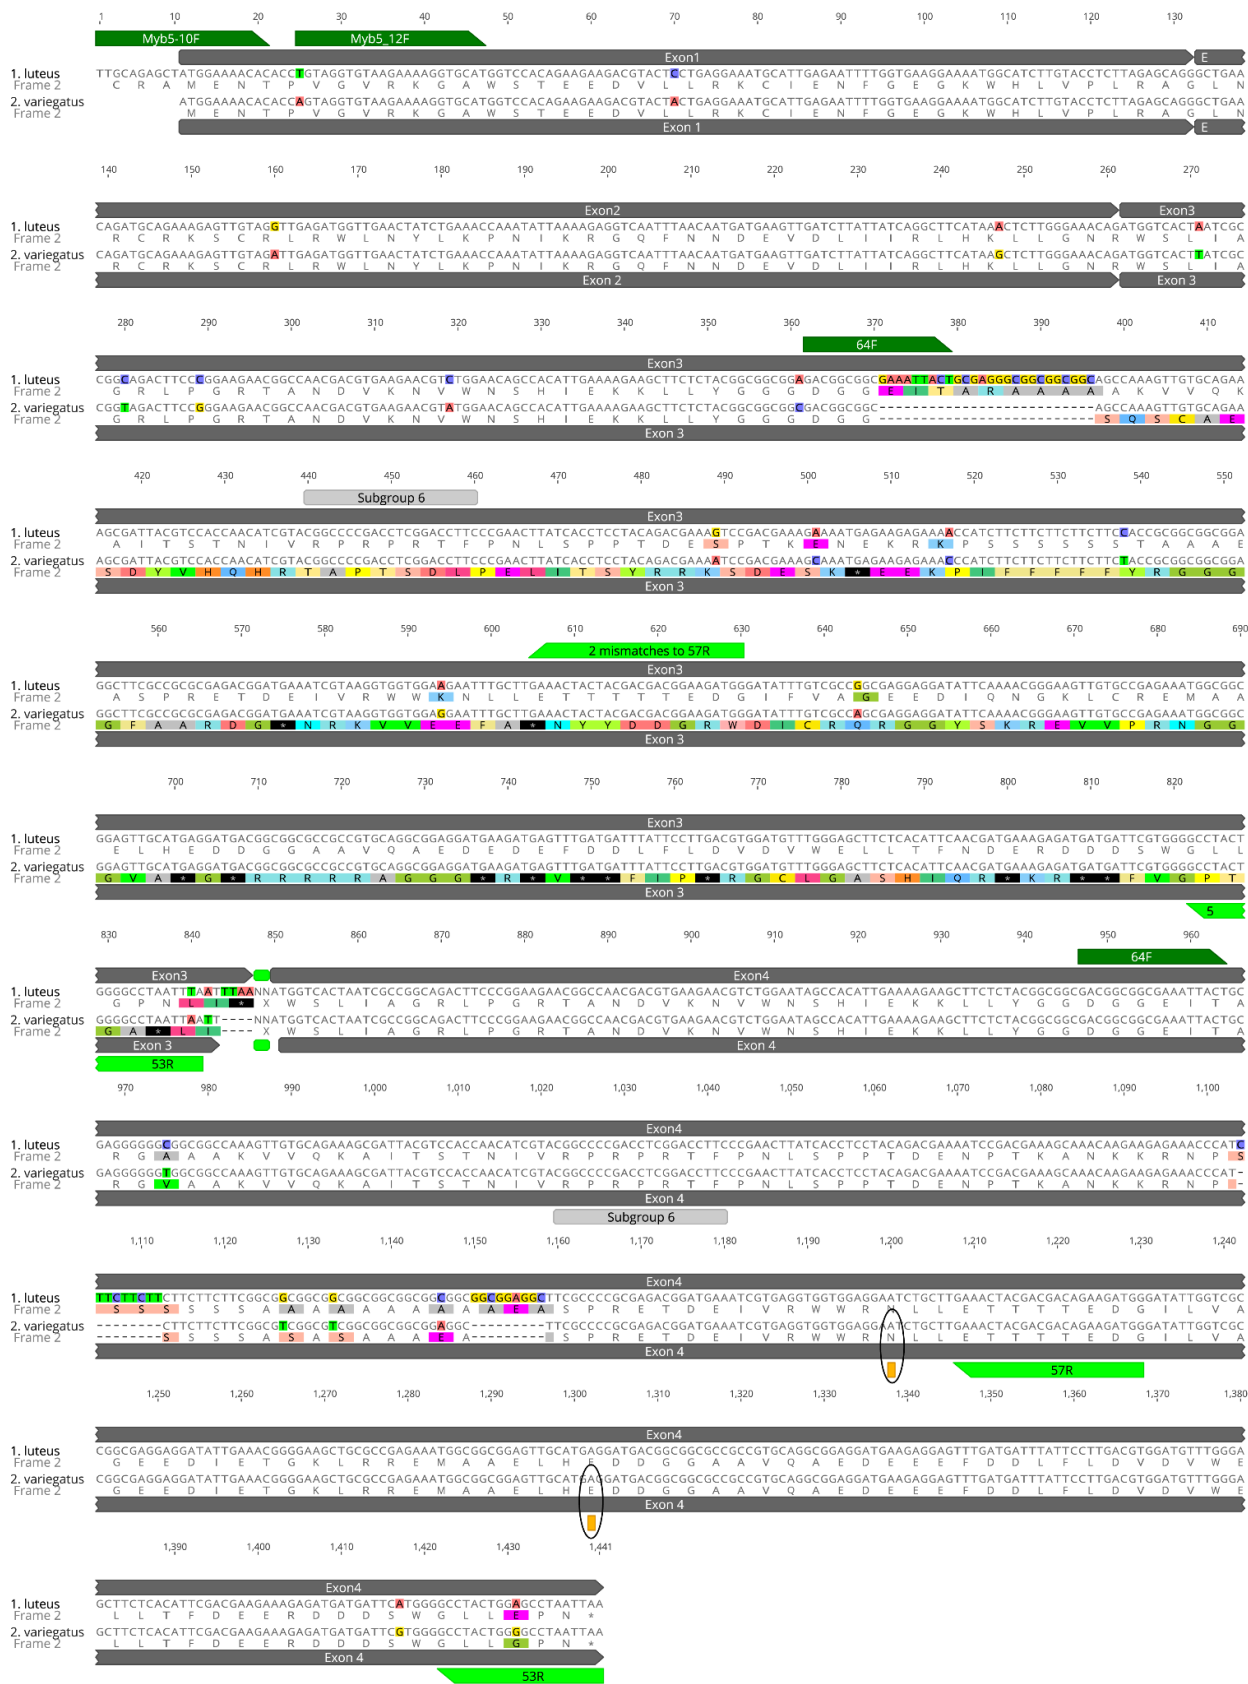

951  
952 **Figure S5.** Alleles of *MYB5a* from the yellow-petaled *M. l. luteus* (top sequence on each line)  
953 and the magenta-petaled (anthocyanin-pigmented) *M. l. variegatus* (bottom sequence on each  
954 line). Primers mentioned in the Methods are shown in dark green (forward primers) and light  
955 green (reverse primers). Exons are marked in gray. Two putative A-to-I editing sites are marked  
956 in yellow. Note that Subgroup 6, which is a hallmark of all known anthocyanin-activating R2R3  
957 MYBs, is present in both taxa in exon 4 as the amino acid sequence RPRPRTF. In exon 3,  
958 however, a frameshift mutation in *M. l. variegatus* eliminates this feature, making it unlikely that  
959 the exon 1-2-3 splice variant of *M. l. variegatus* would be capable of anthocyanin activation.

960

961

962 A

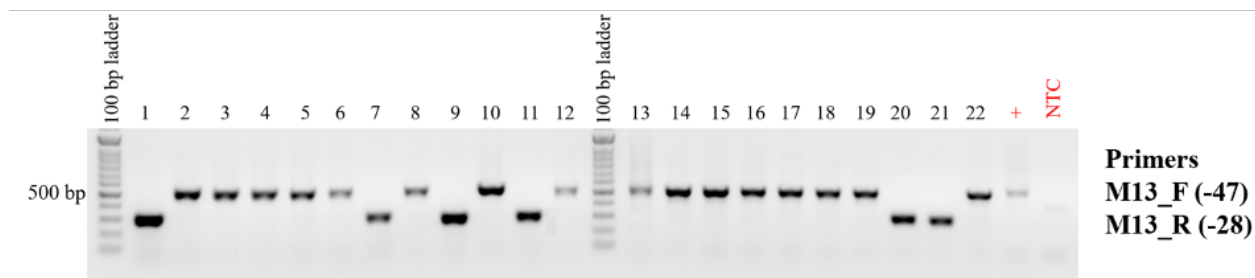

963

964 B

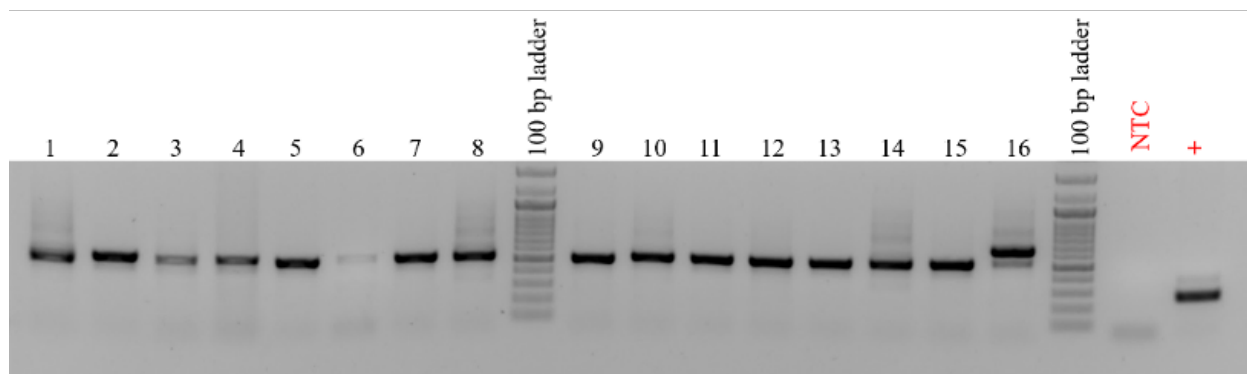

965

966 **Figure S6.** pGEM Cloning of an exon 4 fragment of *MYB5a*. A fragment containing the first  
967 edited site was PCR-amplified using primers 64F-57R and cloned, and colonies were screened

968 for fragment insertion. Lanes with band size ~500 bp are colonies that contain the *MYB5a* exon  
969 4 insert. Lanes with bands ~300 denote empty vectors. (A) Primers M13\_F (-47) and M13\_R (-  
970 28) were used to screen white colonies from a pGEM cloning attempt with *M. l. variegatus* x *M.*  
971 *l. luteus* F1 hybrid gDNA. 16 colonies appear to have taken up the MYB5 exon 4 insert. (B)  
972 Primers M13\_F (-47) and M13\_R (-28) were used to screen white colonies from a pGEM  
973 cloning attempt with *Mlv* gDNA. 15 colonies appear to have successfully taken up the insert.  
974 The band at ~650bp most likely denotes a vector with a longer, incorrect insert.  
975

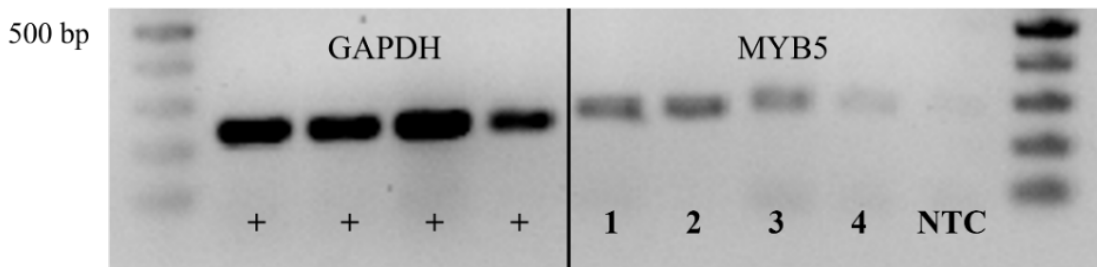

976  
977 **Figure S7.** Relative expression of *MYB5a* in *M. l. variegatus* and *M. l. luteus*. Left: positive  
978 control using GAPDH primers 1F-2R, on each of the samples shown on the right. Right: An  
979 exon 4 fragment of *MYB5a* amplified using Myb5\_64F and Myb5\_57R from cDNA from *M. l.*  
980 *variegatus* inner petal (1) and outer petal (2); the red-spotted *M. l. luteus* inner petal (3); and the  
981 yellow *M. l. luteus* outer petal (4). NTC, No Template Control. All band sizes were as expected.

982  
983

984 **Figure S8.** Leaf photos utilized in quantitative comparisons of anthocyanin production. Photos  
985 excluded due to leaf damage are not included. A. pGFP negative controls, with two transgene  
986 injections per leaf. B. Leaves for which the *M. l. variegatus* *MYB5a* exon 1-2-4 transgene was  
987 injected on the left side of the leaf and the *M. l. luteus* allele on the right. C. Leaves for which the

988 *M. l. variegatus MYB5a* exon 1-2-4 transgene was injected on the right side of the leaf and the

989 *M. l. luteus* allele on the left. Files uploaded separately.

990

991

992
